# Supplementary material for: F‐group bZIPs in barley—a role in Zn deficiency
Source: PubMed Central journal article supplement (PMC5656896; doi:10.1111/pce.13045), 2017-09-19
Supplement: PCE-40-2754-s002.pdf [file PCE-40-2754-s002.pdf]

## **Supporting Information**

Article title: F-group bZIPs in barley – a role in Zn deficiency

Authors: **Ahmad Zulhilmi Nazri, Jonathan H.C. Griffin, Kerry A. Peaston, Douglas G.A. Alexander-Webber and Lorraine E. Williams**

The following Supporting Information is available for this article: Supporting Information Figures S1-S13 and Tables S1-S6

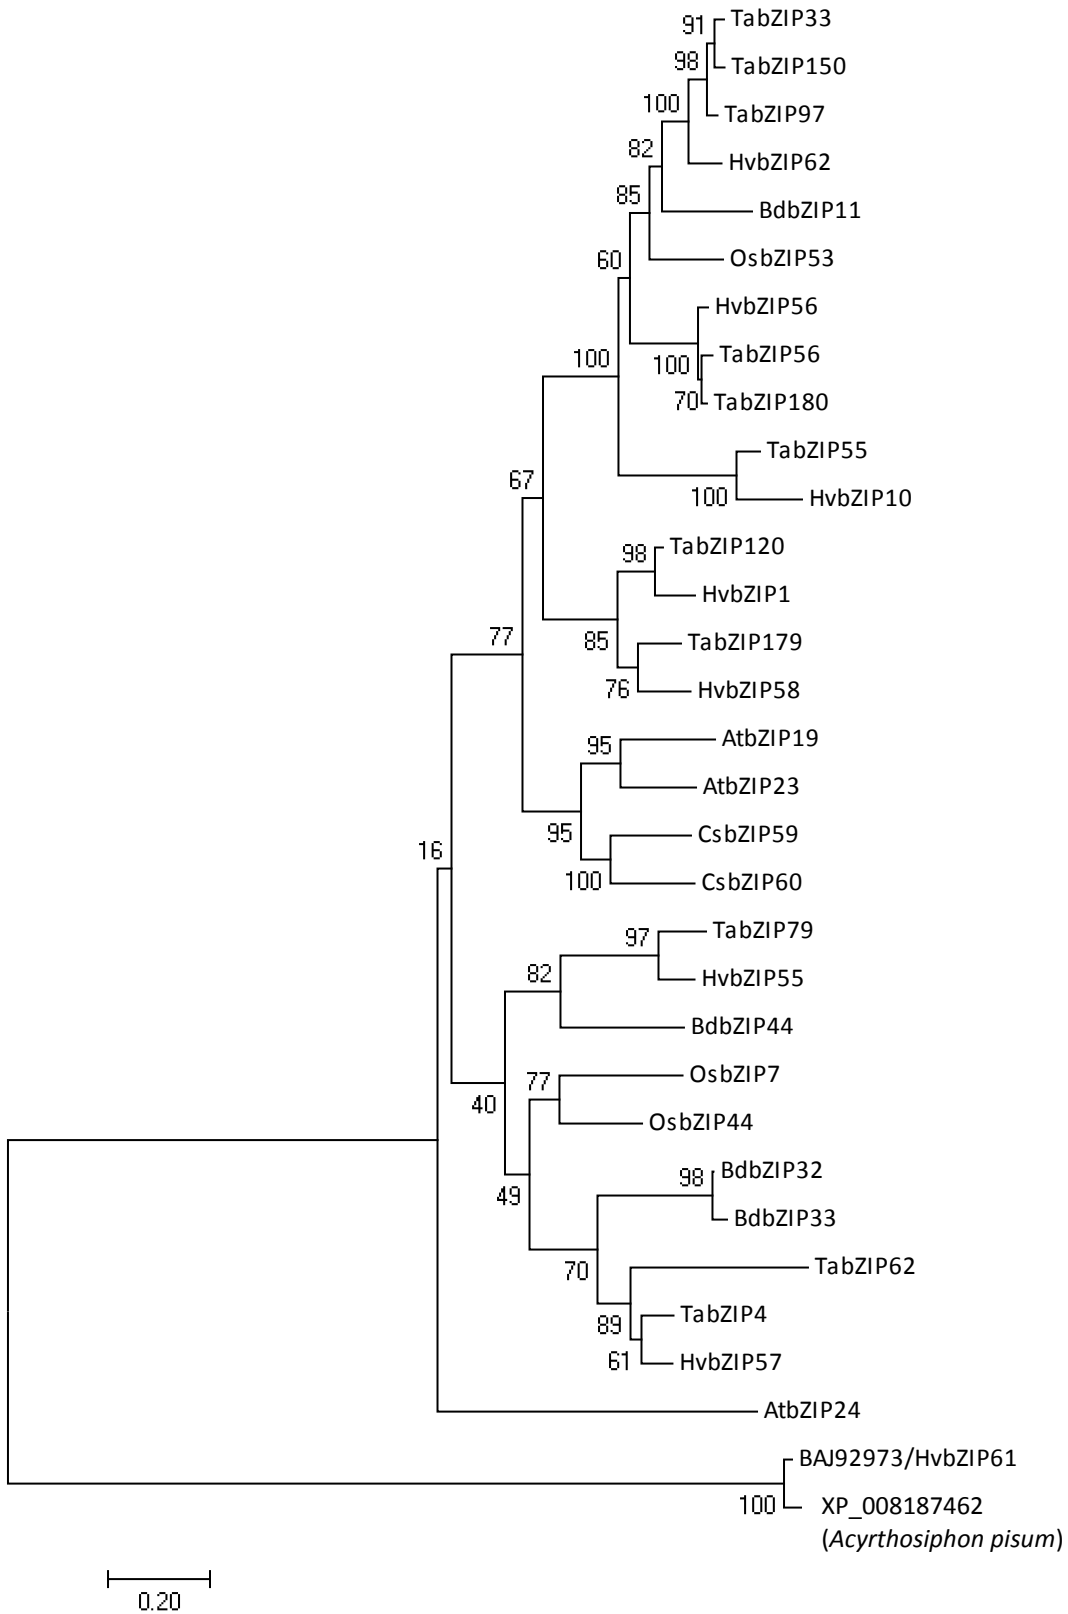

**Fig. S1. Phylogenetic analysis of barley F group bZIPs and BAJ92973/HvbZIP61.** The non-rooted, bootstrapped plot was constructed using MEGA 7 (Kumar *et al.*, 2016) with a multiple alignment of bZIPs from *Hordeum vulgare*, *Triticum aestivum*, *Brachypodium distachyon*, *Oryza sativa*, *Arabidopsis thaliana*, and *Cucumis sativus*. As a comparison, sequence BAJ92973, originally described as HvbZIP61 and XP\_008187462 from *Acyrtosiphon pisum*, are also included in the multiple alignment. The percentage of replicate trees in which the associated taxa clustered together in the bootstrap test (1000 replicates) are shown next to the branches (Felsenstein 1985). The tree is drawn to scale, with branch lengths in the same units as those of the evolutionary distances used to infer the phylogenetic tree. The evolutionary distances were computed using the Poisson correction method (Zuckerkanndl and Pauling 1965) and are in the units of the number of amino acid substitutions per site. All positions containing gaps and missing data were eliminated. Accession numbers and identifier of the predicted proteins are listed in Table S3.

(a)

```

AtbZIP19 : ----- : -
AtbZIP23 : ----- : -
AtbZIP24 : ----- : -
HvbZIP1  : ----- : -
HvbZIP10 : ----- : -
HvbZIP55 : ----- : -
HvbZIP56 : ----- : -
HvbZIP57 : ----- : -
HvbZIP58 : ----- : -
HvbZIP61 : MVSFSTAYQHNSSTAYFSLHLIIPHYHKMSGMSQVVPSCSLLLSNEPTTALSSKAICNLNDTEWDKLRSDMAGKLLLEYLDK : 85
HvbZIP62 : ----- : -

```

```

AtbZIP19 : -----MDDCE-DFSNQE-----VSSSEM----- : 19
AtbZIP23 : -----MDDCE-DFSNNS-----M-----G----- : 14
AtbZIP24 : -----MDDCE-DFSNNS-----MCCCKDCR----- : 9
HvbZIP1  : -----MDDCH-DFCSS----- : 10
HvbZIP10 : -----MDDNCD-DFDNP-----TSLCPAM----- : 20
HvbZIP55 : -----MDDCIY-DFPSHL-----LFPYPE----- : 19
HvbZIP56 : -----MDDCD-DFSNPE-----TSLCEAM----- : 19
HvbZIP57 : -----MDDGVD-LPSQF-----LFSHPE----- : 17
HvbZIP58 : -----MDDCD-DFSS----- : 10
HvbZIP61 : LYDKNDESETITDWLNEEFIDLPIDDDFMTNTSPNNIEMKPMYQKQFVPSNKAIQYQPYTQQYAPMYCHETSQPKFNYPVSA : 170
HvbZIP62 : -----MDDCD-DFSNPE-----ALDAAA----- : 19

```

**DOMAIN 1 DOMAIN 2**

**C[ST]HTH[ST]CNP[PT]GPE H[ST]HTC[FL]H[AV]HT**

```

AtbZIP19 : ---GELPPSNC---NDSFELG---LIMDT---NAPCTHTHTCNPTGPE---THTHTCFVH---KILPDESDEKV : 79
AtbZIP23 : ---GEL--PSCS---NDSFELG---LIRDS---H2CTHTHTCNPTGPE---THTHTCFVH---KILPDKV--- : 67
AtbZIP24 : ---GNQRVSNFDSLTVGFVGLDFEGPQNRQYIKMNEEEDKQDRVTRGCSHTHTCNPTGPE---THTHTCFVH---KILPDESDEKV : 91
HvbZIP1  : ---GSDPSSNCFDLSYFID---LIMDT---NAPCTHTHTCNPTGPE---THTHTCFVH---KILPDESDEKV : 64
HvbZIP10 : ---GGDPHSDSCMS---DSYFID---LTK-DPEHL-2CTRILLAE---SDDVAE--- : 61
HvbZIP55 : ---GSDPSSNCFDLSYFID---LTK-DPEHL-2CTRILLAE---SDDVAE--- : 66
HvbZIP56 : ---GNDPPASC---NDSYFID---LNSADHL-2CTHTHTCNPTGPE---THTHTCFVH---KILPDESDEKV : 82
HvbZIP57 : ---GSDPSSNCFDLSYFID---LTK-DPEHL-2CTRILLAE---SDDVAE--- : 66
HvbZIP58 : ---GSDPSSNCFDLSYFID---LTK-DPEHL-2CTRILLAE---SDDVAE--- : 65
HvbZIP61 : SLTPPESPDKTDV---MSMLDM---QPEELSGLVVDDETSDF-----MSSDASSHTDSYSDI---KRDKP--- : 231
HvbZIP62 : ---A---GGGCS---NDSYFID---LTK-DPEHL-2CTHTHTCNPTGPE---THTHTCFVH---KILPDESDEKV : 78

```

**bZIP DOMAIN**

```

AtbZIP19 : STDD-----TAESCCKRGERRTGNEEAVRKYREKKKKAASLEDEVARLRANQQLVKKLQNCATLEEVSRLLRCLLVVIRGR : 158
AtbZIP23 : STDD-----TSER---SGRKRRTGNEEAVRKYREKKKKAASLEDEVMRLKAVNNQLKRLQGAALAEVTRLRCLLVVIRGR : 143
AtbZIP24 : -----DHSDSNKRRLCNGNEEAVRKYREKKKKAASLEDEVMRLKAVNNQLKRLQGAALAEVTRLRCLLVVIRGR : 164
HvbZIP1  : AGAETPAEFEDAHTFRSFRKRRSGNQAARVRYREKKKKAASLEDEVARLRANQQLVKKLQNCATLEEVSRLLRCLLVVIRGR : 149
HvbZIP10 : -TS-----ESPQDGPKRREBGNFAAVRYREKKKKAASLEDEVARLRANQQLVKKLQNCATLEEVSRLLRCLLVVIRGR : 138
HvbZIP55 : -----EQDELRLNPKKLGNEEAVRKYREKKKKAASLEDEVARLRANQQLVKKLQNCATLEEVSRLLRCLLVVIRGR : 139
HvbZIP56 : -T-----SESLPDAKCRFSNGFAAVRYREKKKKAASLEDEVARLRANQQLVKKLQNCATLEEVSRLLRCLLVVIRGR : 157
HvbZIP57 : -----EDDDAARFRRTGNEEAVRKYREKKKKAASLEDEVARLRANQQLVKKLQNCATLEEVSRLLRCLLVVIRGR : 139
HvbZIP58 : -GAETPAEFEDAHTFRSFRKRRSGNQAARVRYREKKKKAASLEDEVARLRANQQLVKKLQNCATLEEVSRLLRCLLVVIRGR : 149
HvbZIP61 : -----YSPKAPNEKRLAKKQCNNAATRYRMKKKEIKESVVEKQLQRNDTKD---EAKETAREKYLKSLIRVYKA : 305
HvbZIP62 : -A-----GNSASKRRTGNEEAVRKYREKKKKAASLEDEVARLRANQQLVKKLQNCATLEEVSRLLRCLLVVIRGR : 150

```

**Basic region leucine-zipper region**

```

AtbZIP19 : IDG--EIGAFPPYQRMAANIPS-----FSHMNPQNVQ---CDD-EVYQPQN--VFGVNSQEGASINDQGLS--G- : 218
AtbZIP23 : IDG--EIGAFPPYQRPAVTNVP-----YSYMMHPQNMQ---CDVDNLYQLQN---GNNEGASMNQGLN--G- : 200
AtbZIP24 : IEV--EIGAFPPYQRQCNQSGVGFVKE-----DGCNLTASNMMCEAARVDEEQQT---LHDP-IQ---- : 217
HvbZIP1  : IEG--EIGAFPPYQRPAKAGAGQ-----GGAQIMSSQDFIG---TCEQ-PHTCFH----- : 192
HvbZIP10 : IEG--EIGAFPPYQRPVKNKDLADQG---SSLGIGG--AQKVRRLR---CNN-PVYCSPE--MPAT---TMDDDGVI-SGE : 200
HvbZIP55 : IDE-AETGALPDERCSFGSVVCTA-----AELTP-----CFDASGAEVAAYREAGVDGDDGIVSGE- : 195
HvbZIP56 : IEG--EIGAFPPYQPSVKSNEFV---DQGSFLGGAQV-MNSQDFR---CND-QLYCNFG--MQQAR---TMDDDGVMASAGQ : 222
HvbZIP57 : IDAEVAAGCFPPYQRQCAKGDGPGSA---AAGAGAAGPVMSSCGFVR---TCEQ-PPVCFR---CFNNGNSEVGGACWG---DSSGPASAD : 191
HvbZIP58 : IEG--EIGAFPPYQRQAKGDGPGSA---AAGAGAAGPVMSSCGFVR---TCEQ-PPVCFR---CFNNGNSEVGGACWG---DSSGPASAD : 201
HvbZIP61 : KGL---IN----- : 310
HvbZIP62 : IEG--EIGAFPPYQRPAKNVDLVSSGVDQGGFLGSAQVITNSQDFR---CND-QMYCNFG--MQMR---AMGDDGAI-SGQ : 218

```

```

AtbZIP19 : -----CDFDQLQCMANQNLNNGN-----GSFSNVNTSVSNKRKGGHRASRAV : 261
AtbZIP23 : -----CEFDQLQCLANQNLAGEIPIVCSNGIGTFT-VNMSGVNRKKEGPRAAKAV : 249
AtbZIP24 : -----SFPVQPPFFSR----- : 228
HvbZIP1  : ----- : -
HvbZIP10 : LLGQGANDKWLPLGLPDDVK-R----- : 220
HvbZIP55 : L-----GVPEVVDVAV-----ASFVNSVA----- : 213
HvbZIP56 : VLGGAGGDTM-----GCVK-PGSLNPPGCRGGQML----- : 251
HvbZIP57 : C-----GLDEDANGAAAREVDAPGRPVRAMDVVLELCPFS----- : 225
HvbZIP58 : ----- : -
HvbZIP61 : ----- : -
HvbZIP62 : MFGQGAGDVANIQCIGGAK-SGLTMPGCGGMGTMPSGCLPSSEKQ----- : 263

```

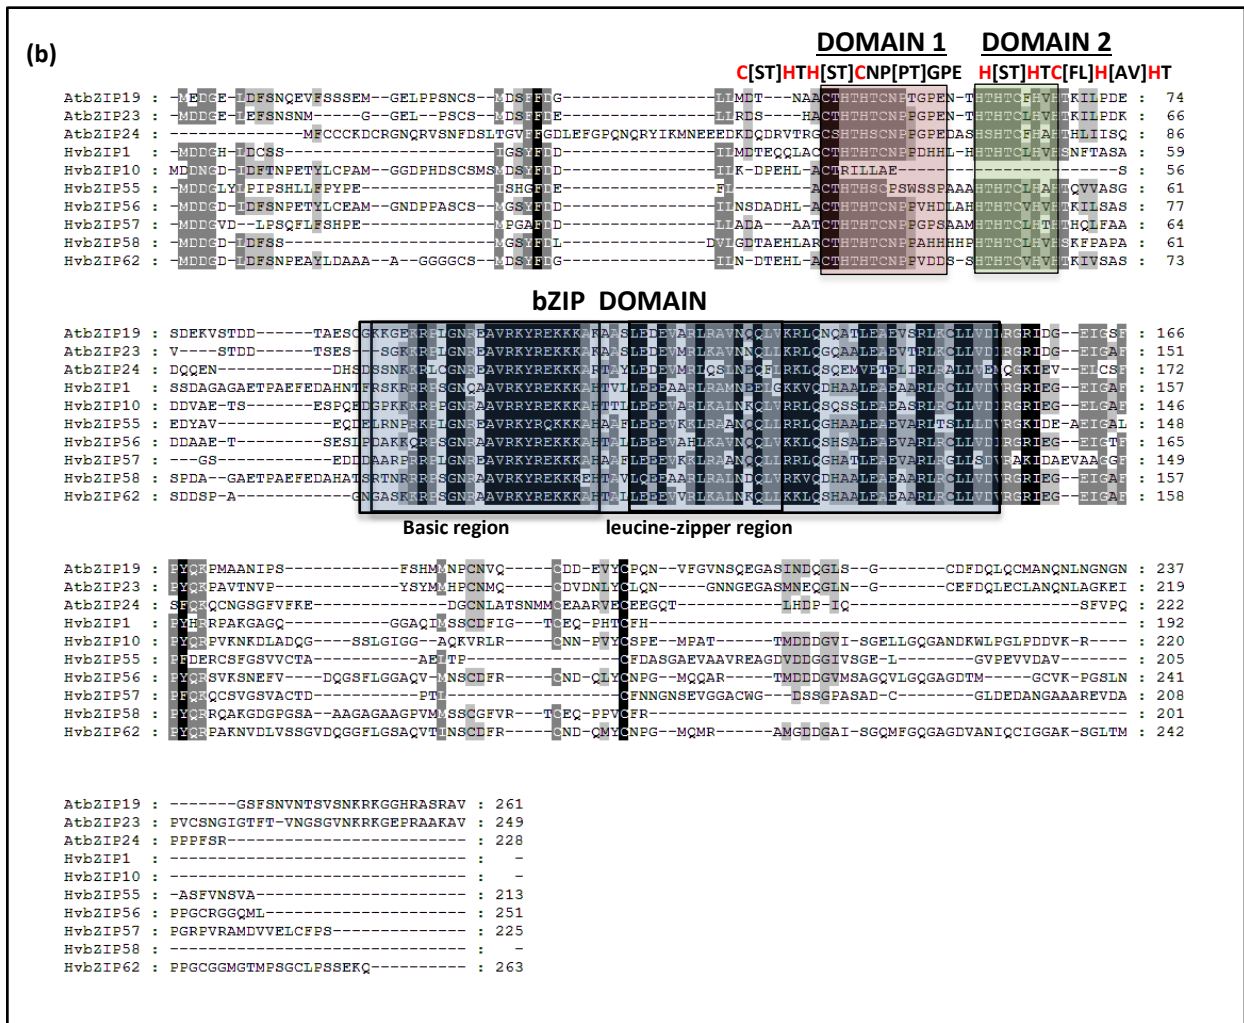

**Fig. S2 Amino acid multiple alignment of Arabidopsis and barley F group bZIPs.** Alignment including (a) or omitting (b) HvbZIP61/BAJ92973; a putative aphid sequence. Sequences were aligned using the Clustal Omega algorithm (Sievers et al., 2011) and presented using GeneDoc (Nicholas and Nicholas Jr, 1997). For the sequences aligned here: black = conserved residues, dark grey = conserved in at least nine of the sequences, and light grey = conserved in at least seven of the sequences. The bZIP domain and the two conserved Cys/His-rich domains (domain 1 and 2) are highlighted. Above the latter two are the sequence of the Arabidopsis F group bZIPs (Jakoby et al. 2002). The bZIP domain is boxed according to information given for AtbZIP19 at <http://www.uniprot.org/> with the first box indicating the basic region and the second box indicating the leucine zipper region within the domain.

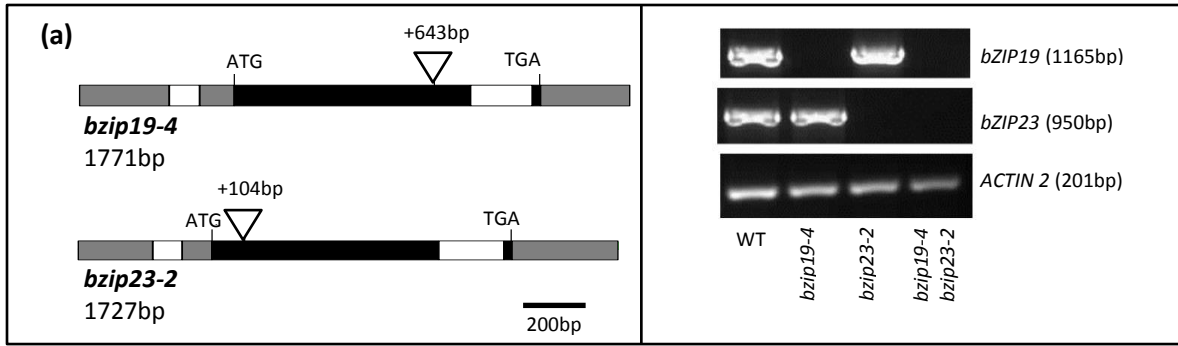

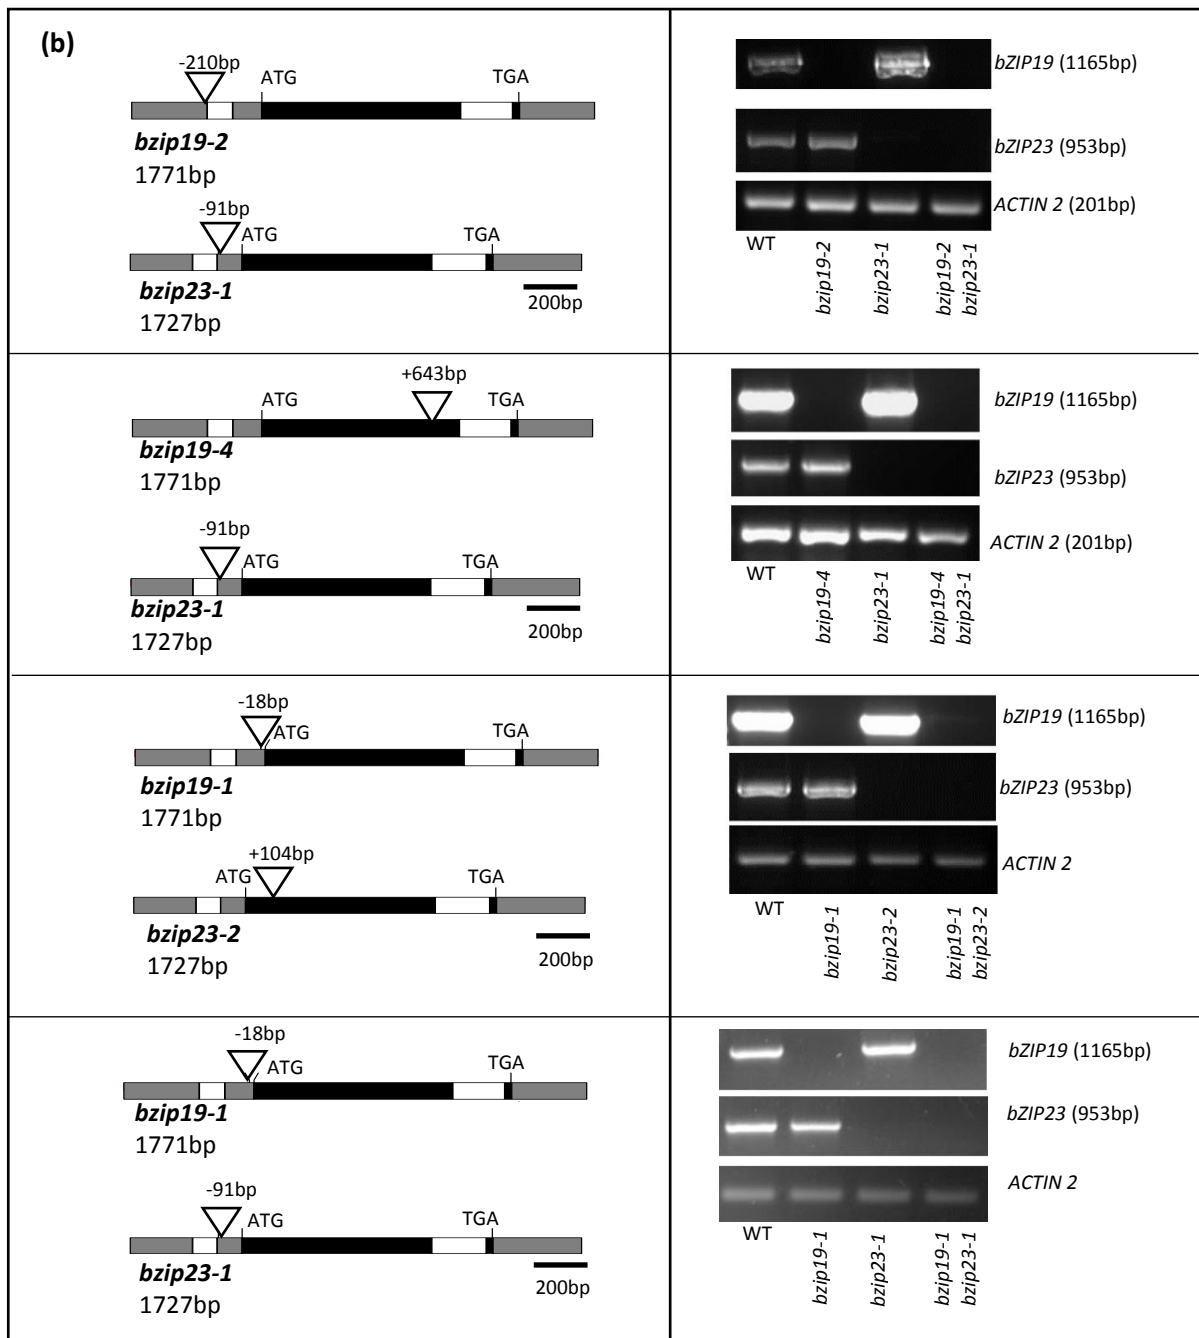

**Fig. S3 Mutant alleles for *AtbZIP19* and *AtbZIP23*.** Left, Schematic drawings showing position of inserts for mutant alleles (a) *bzip19-4 bzip23-2* (b) *bzip19-2 bzip23-1*, *bzip19-4 bzip23-1*, *bzip19-1 bzip23-2*, *bzip19-1 bzip23-1*. Black bars exons, white bars introns and grey bars untranslated regions. A of ATG is taken as 0. Triangle represents T-DNA. Right, corresponding gel image showing the expression of *AtbZIP19* and *AtbZIP23* at RNA level in the different mutant lines, with *AtACTIN2* as control.

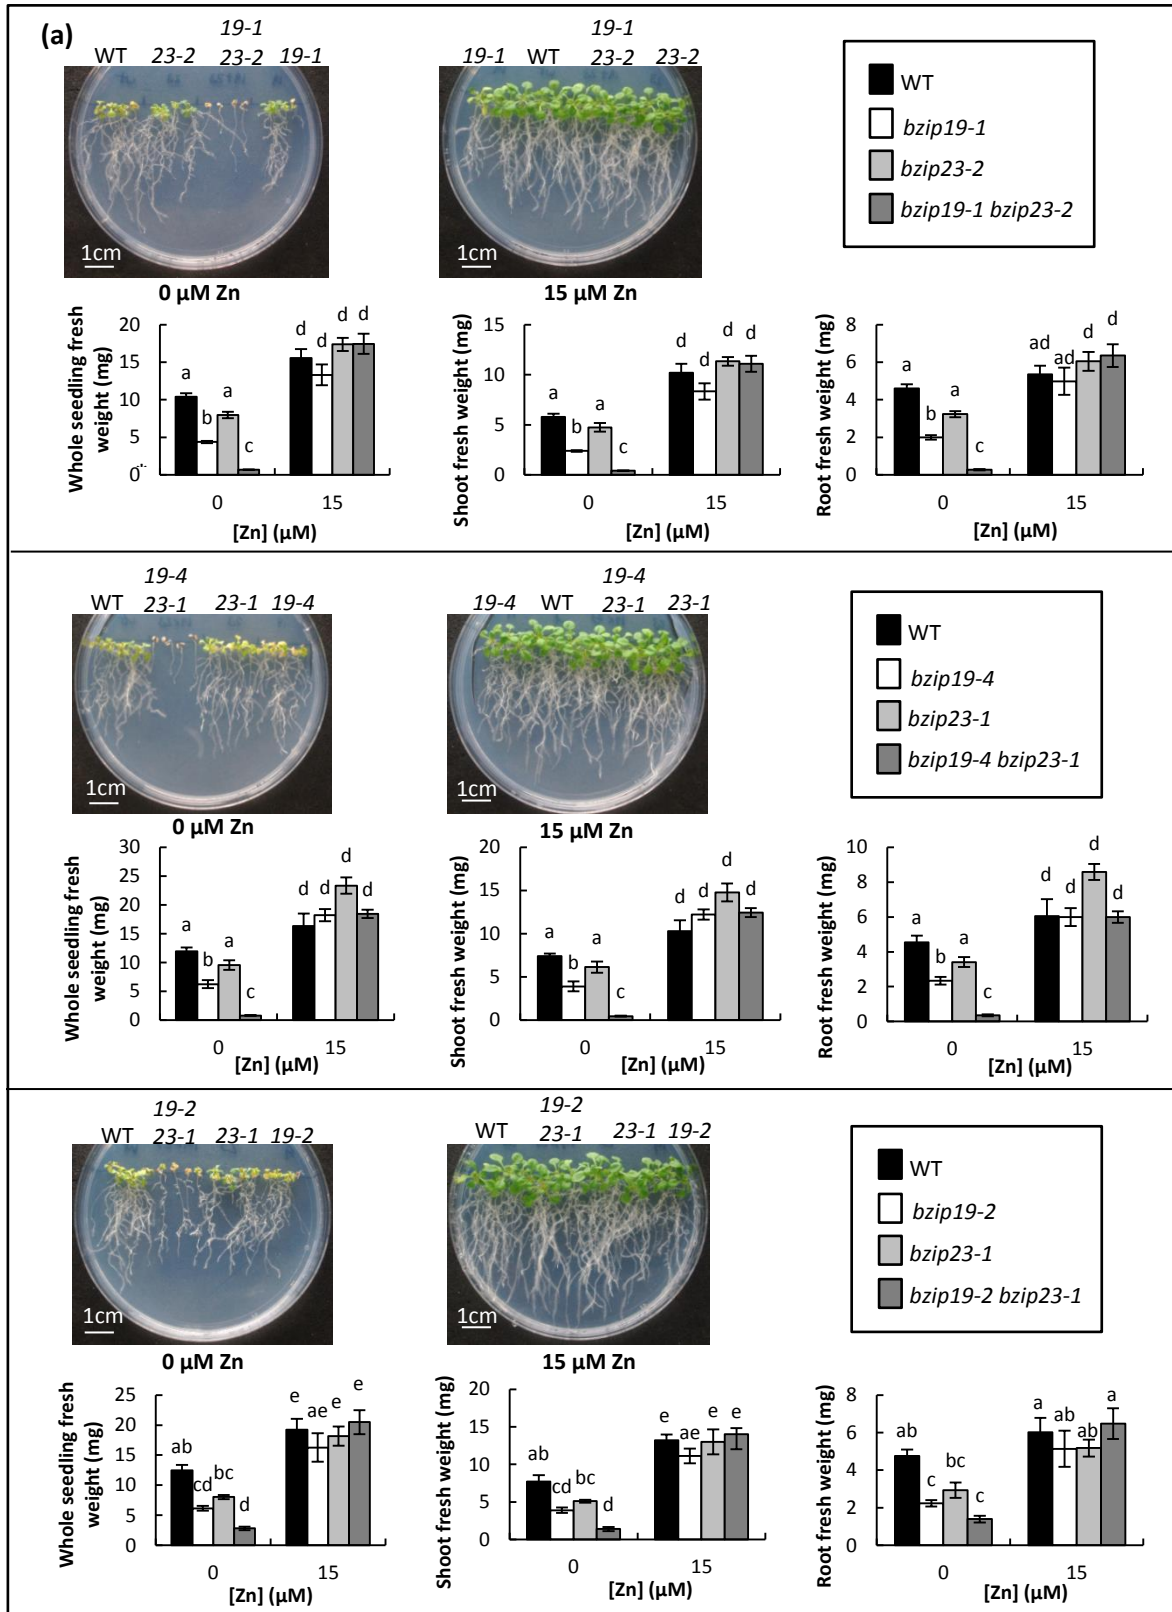



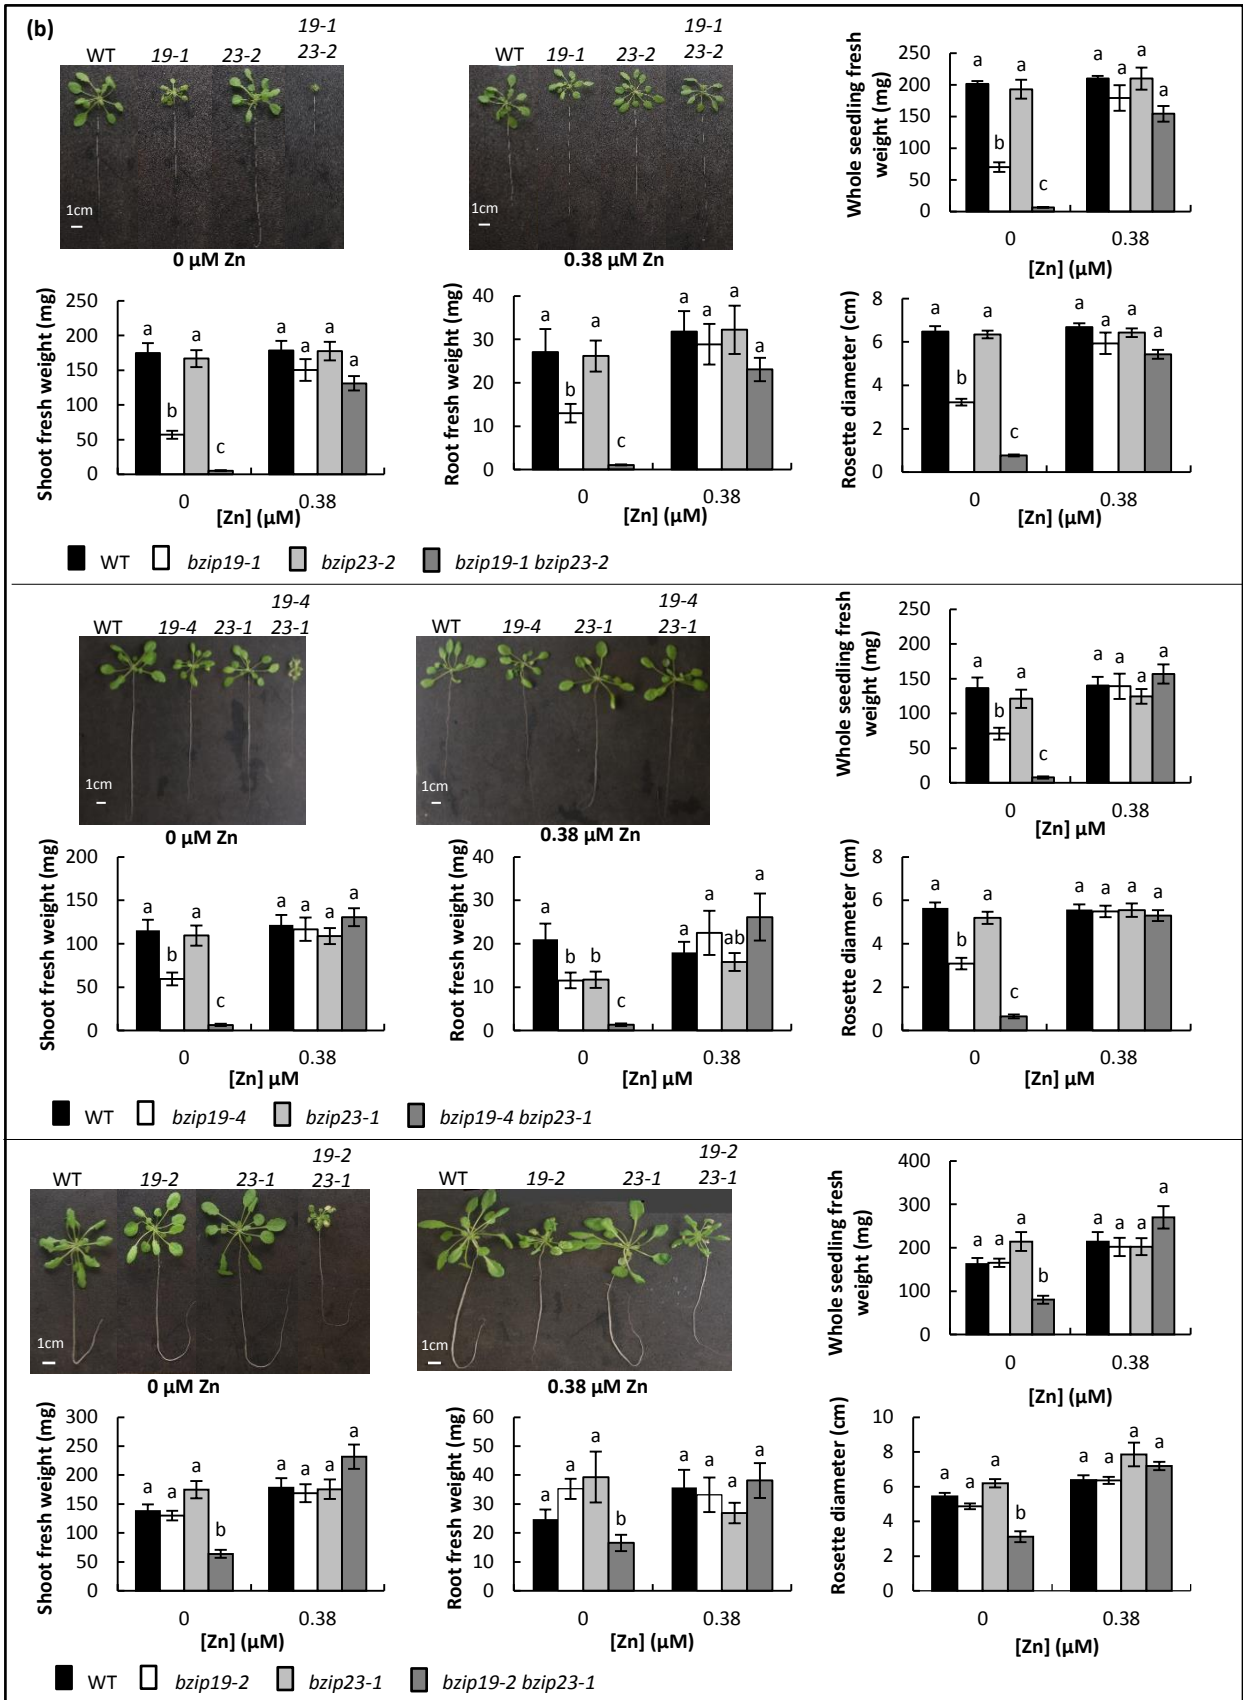

**Fig. S4 Zn-deficiency phenotype of the additional *bzip19 bzip23* double mutants in plate and hydroponic assays.** Wild type (WT), *bzip19*, *bzip23*, and *bzip19 bzip23* T-DNA insertion *Arabidopsis thaliana* mutants grown on agarose half MS plates for 21 days with 0  $\mu\text{M}$  Zn or 15  $\mu\text{M}$  Zn (a) or hydroponic culture for 40 days with 0  $\mu\text{M}$  Zn or 0.38  $\mu\text{M}$  Zn (b). For each growth condition, fresh weight measurements for total, shoot and root weight are shown. Rosette diameter is also shown for the hydroponically grown plants. For the plate assays, the means ( $\pm$  SEM) were based on six plates with four seedlings per line, per plate, each plate containing four plant lines. For hydroponic assays the means ( $\pm$  SEM) were based on 30 plants. For plate and hydroponic assays means not sharing a letter are significantly different ( $P \leq 0.05$ ); Tukey post-hoc test.

(a)

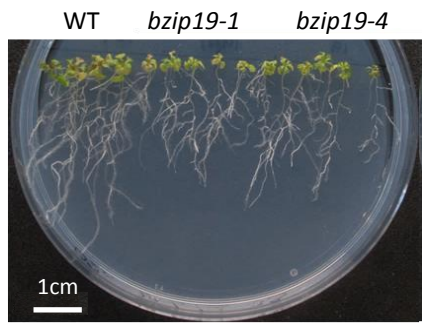

0 μM Zn

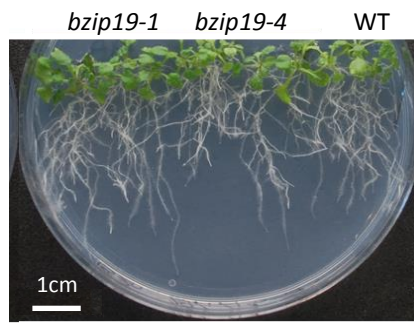

15 μM Zn

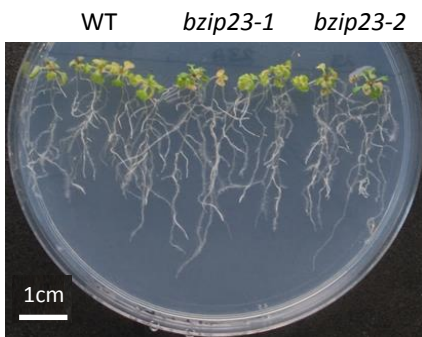

0 μM Zn

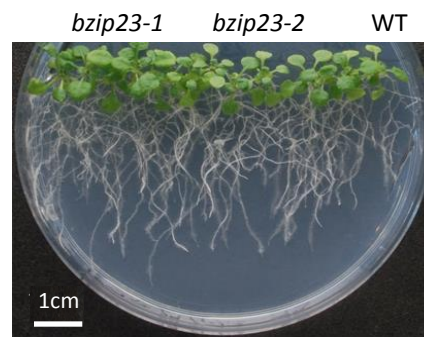

15 μM Zn

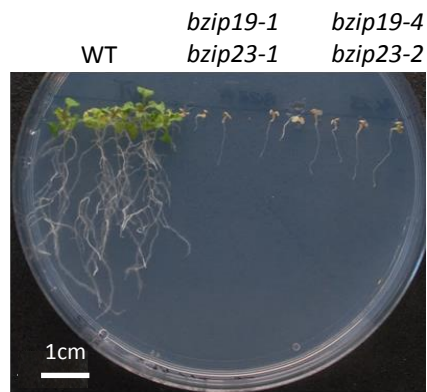

0 μM Zn

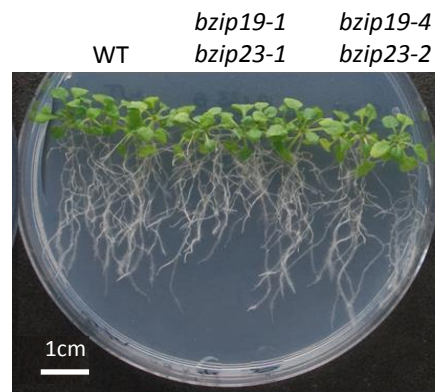

15 μM Zn

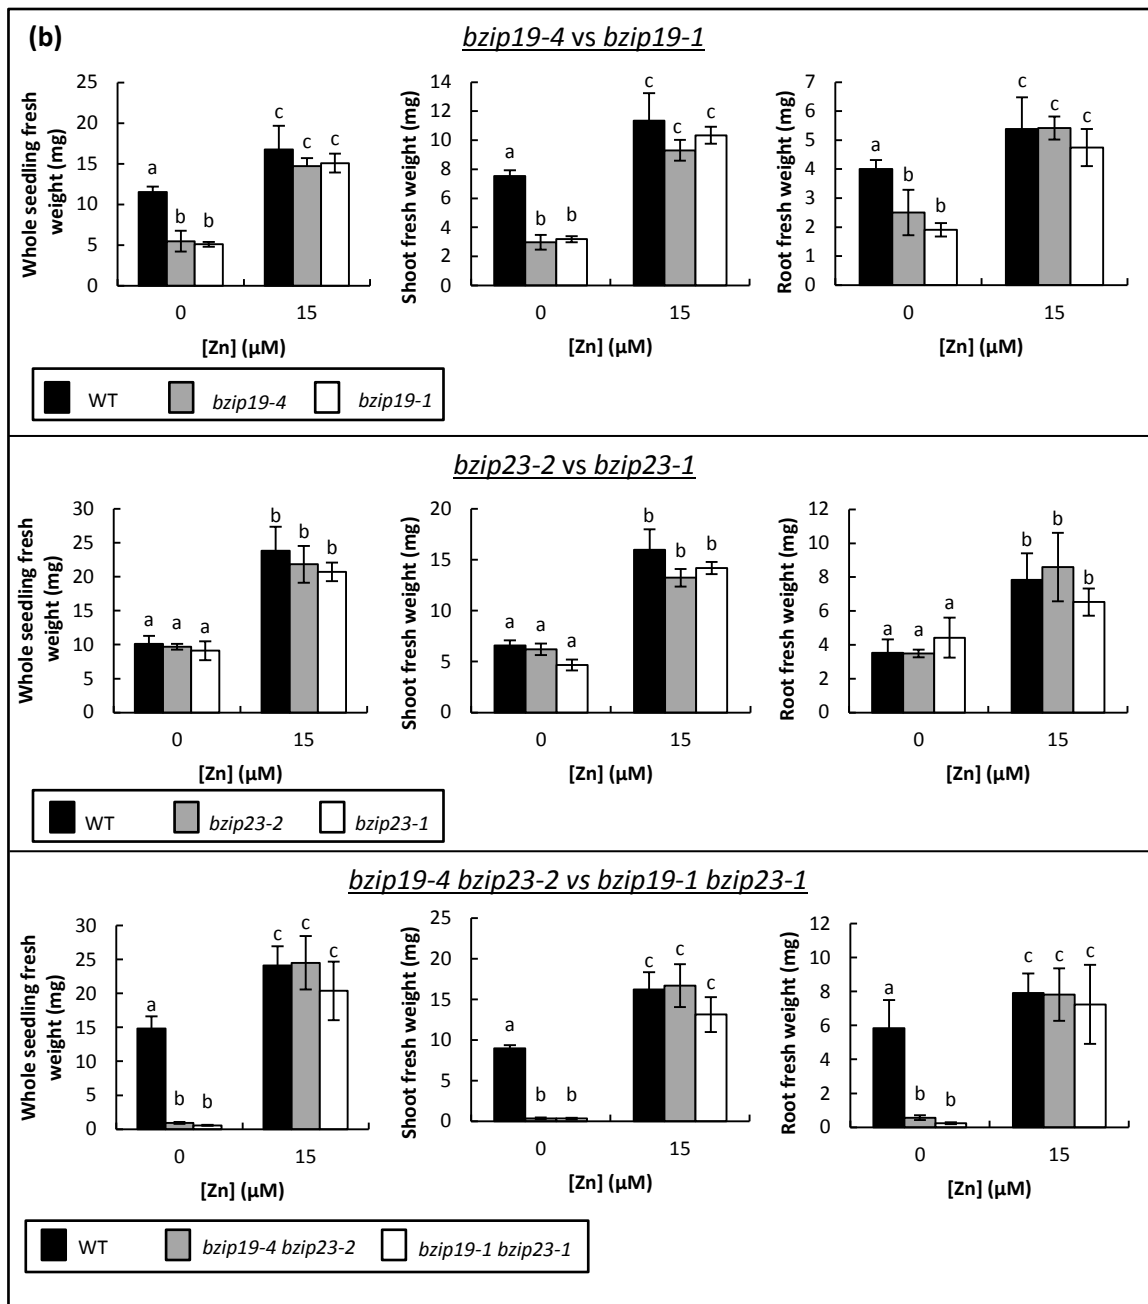

**Fig. S5** Direct comparison of single and double mutant **bZIP** alleles. (a) *bzip19-4* and *bzip19-1*, *bzip23-2* and *bzip23-1*, *bzip19-4 bzip23-2* and *bzip19-1 bzip23-1* were directly compared by growing on agarose half MS plates for 21 days with 0 μM Zn or 15 μM Zn. Wild type (WT) plants were included. (b) For each growth condition, total fresh weight is shown. The means (+/- SEM) were based on six plates, with five seedlings per line, per plate, each plate containing three plant lines. Means not sharing a letter are significantly different ( $P \leq 0.05$ ); Tukey post-hoc test.

(i)

(a)

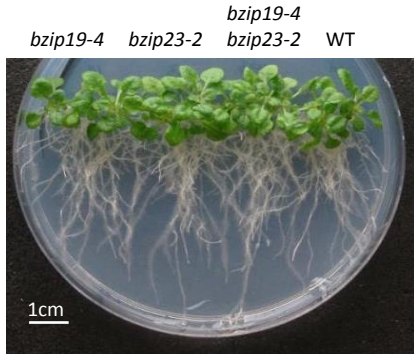

15  $\mu\text{M}$  Zn 0.05  $\mu\text{M}$  Cu

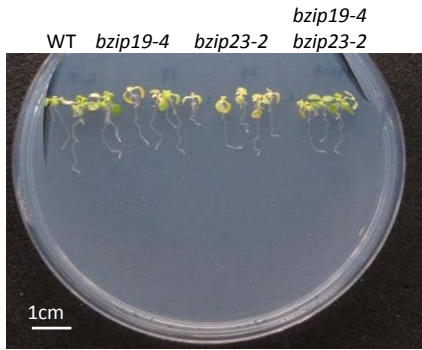

15  $\mu\text{M}$  Zn 0  $\mu\text{M}$  Cu

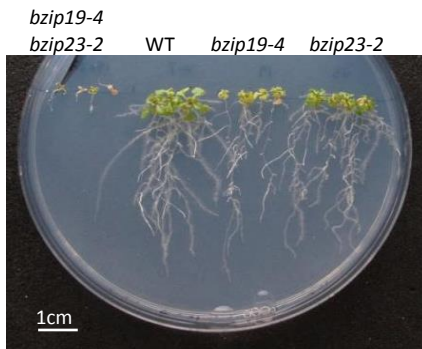

0  $\mu\text{M}$  Zn 0.05  $\mu\text{M}$  Cu

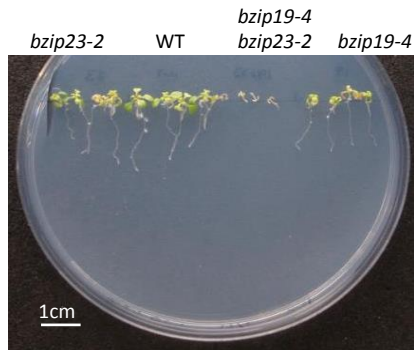

0  $\mu\text{M}$  Zn 0  $\mu\text{M}$  Cu

(b)

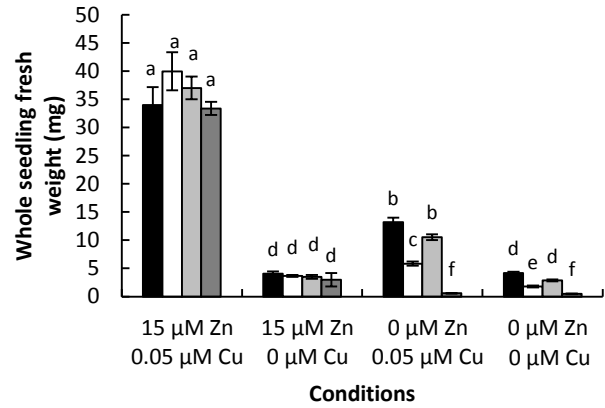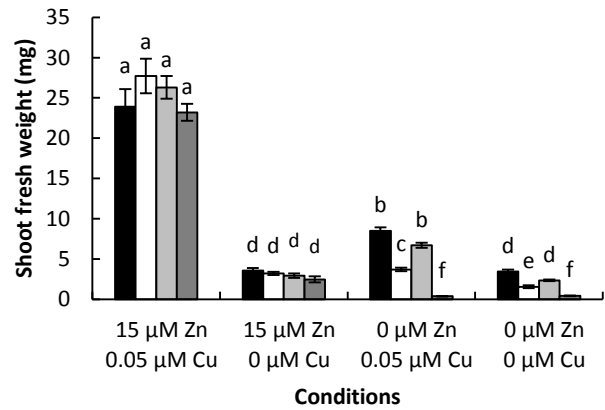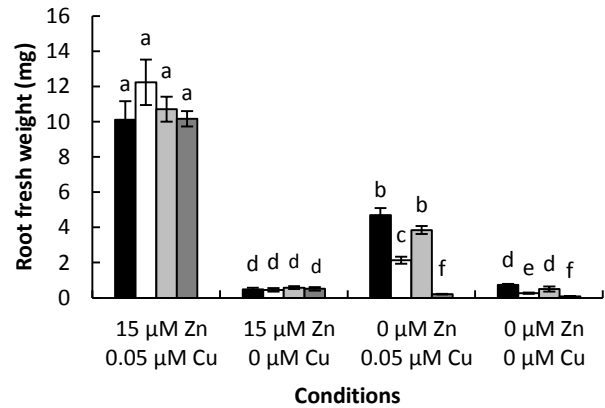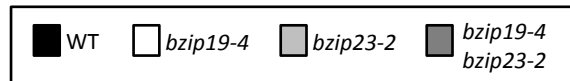

(ii)

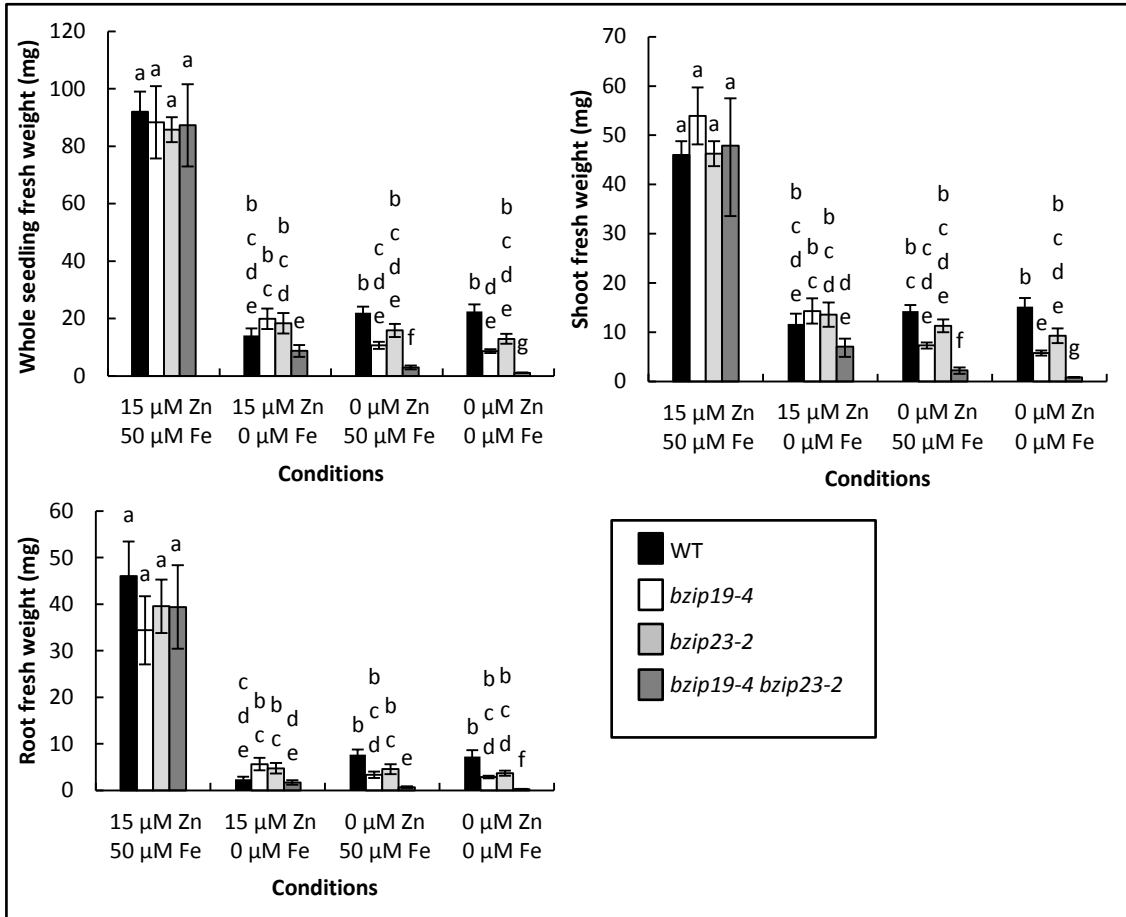

**Fig. S6 Cu deficiency (i) or Fe deficiency (ii) does not specifically affect *bzip19*, *bzip23* and *bzip19 bzip23* mutants compared to wild type.** (a) Wild type (WT), *bzip19-4*, *bzip23-2* and *bzip19-4 bzip23-2* mutants grown on half MS media under a range of Cu and Zn concentrations (i) or Fe and Zn concentrations (ii). For the 0 Cu conditions, no Cu was added to the media and the Cu chelator, Bathocuproine (50 μM) was present. Total, shoot and root fresh weight is shown; the means (+/- SEM) were based on six plates, with four seedlings per line, per plate, each plate containing four plant lines. Means not sharing a letter are significantly different ( $P \leq 0.05$ ); Tukey post-hoc test.

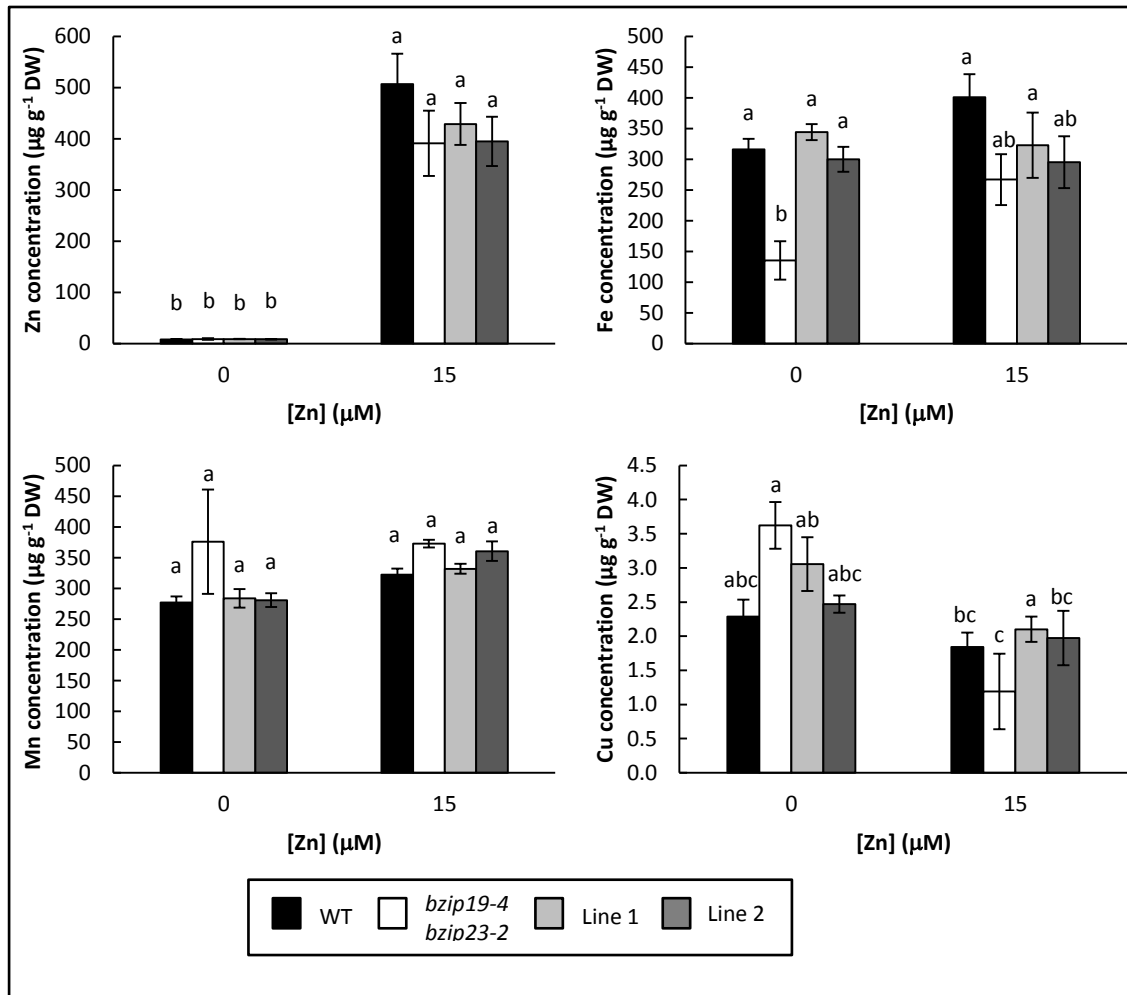

**Fig. S7 Metal concentrations in wild type (WT), *bzip19-4 bzip23-2* double mutant, and bZIP56-expressing double mutant lines.** Plants were grown on half MS media for 21 days with 0 μM or 15 μM Zn. Data are means (+/- SEM) of four biological replicates. Means not sharing a letter are significantly different ( $P \leq 0.05$ ); Tukey post-hoc test.

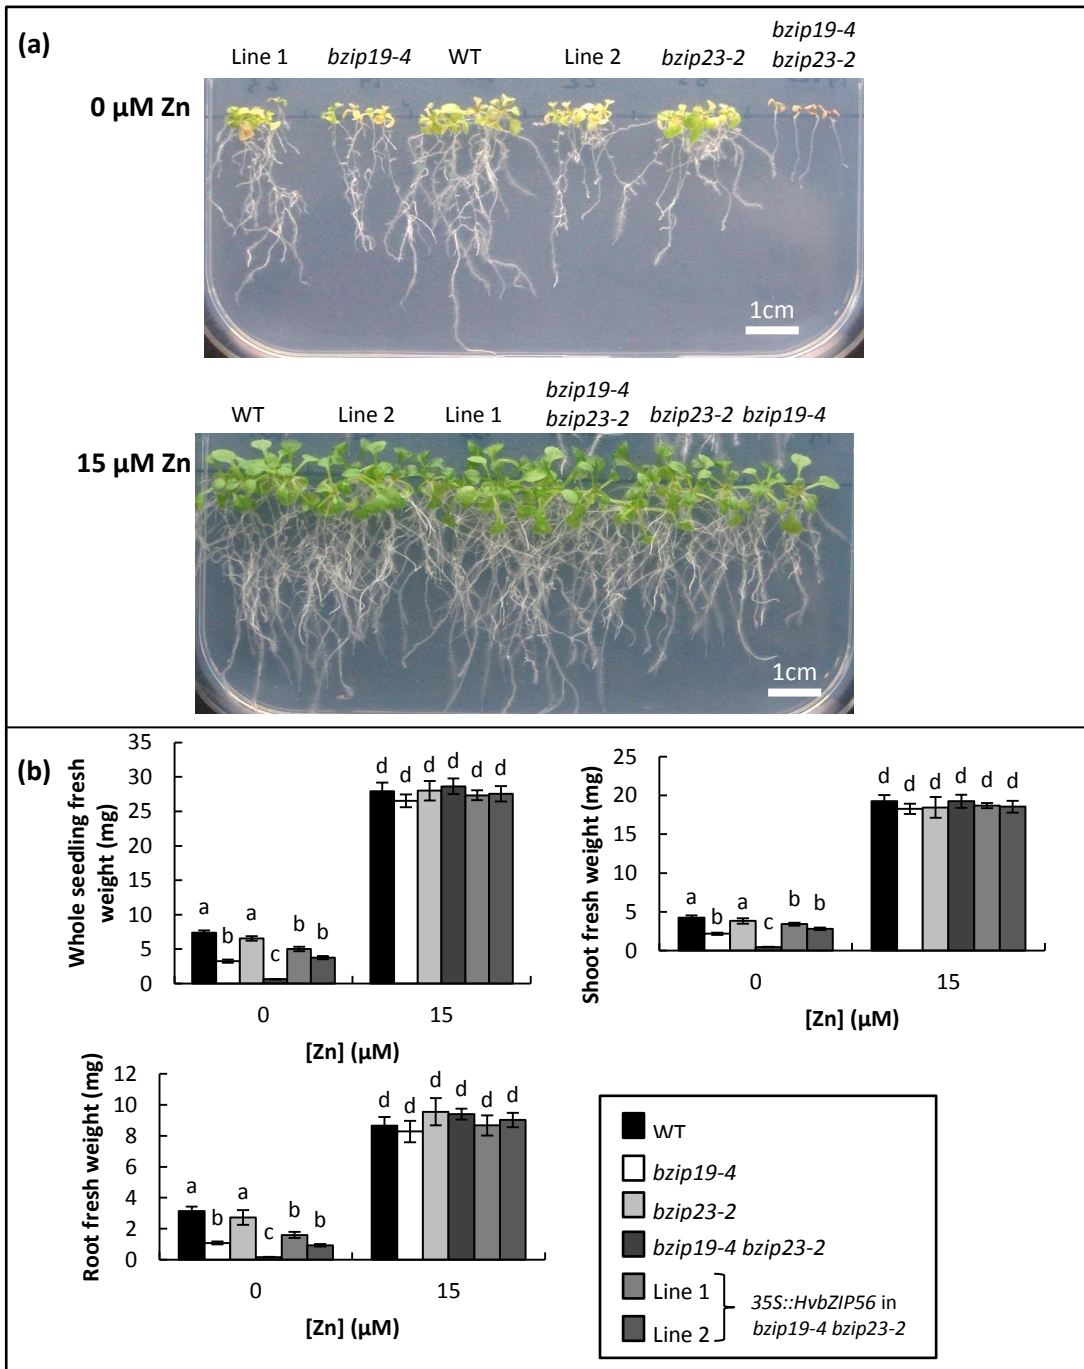

**Fig. S8** HvbZIP56-expressing *bzip19-4 bzip23-2* lines grow to a similar level to *bzip19-4* single mutant under Zn-deficiency. Wild type (WT), *bzip19-4 bzip23-2* mutants and transgenic lines grown on half MS media for 21 days with 0  $\mu\text{M}$  Zn or 15  $\mu\text{M}$  Zn. (a) Images of representative plates; (b) total, shoot and root fresh weight are shown for each construct. The means ( $\pm$  SEM) were based on six plates, with four seedlings per line, per plate, each plate containing four plant lines. Means not sharing a letter are significantly different ( $P \leq 0.05$ ); Tukey post-hoc test.



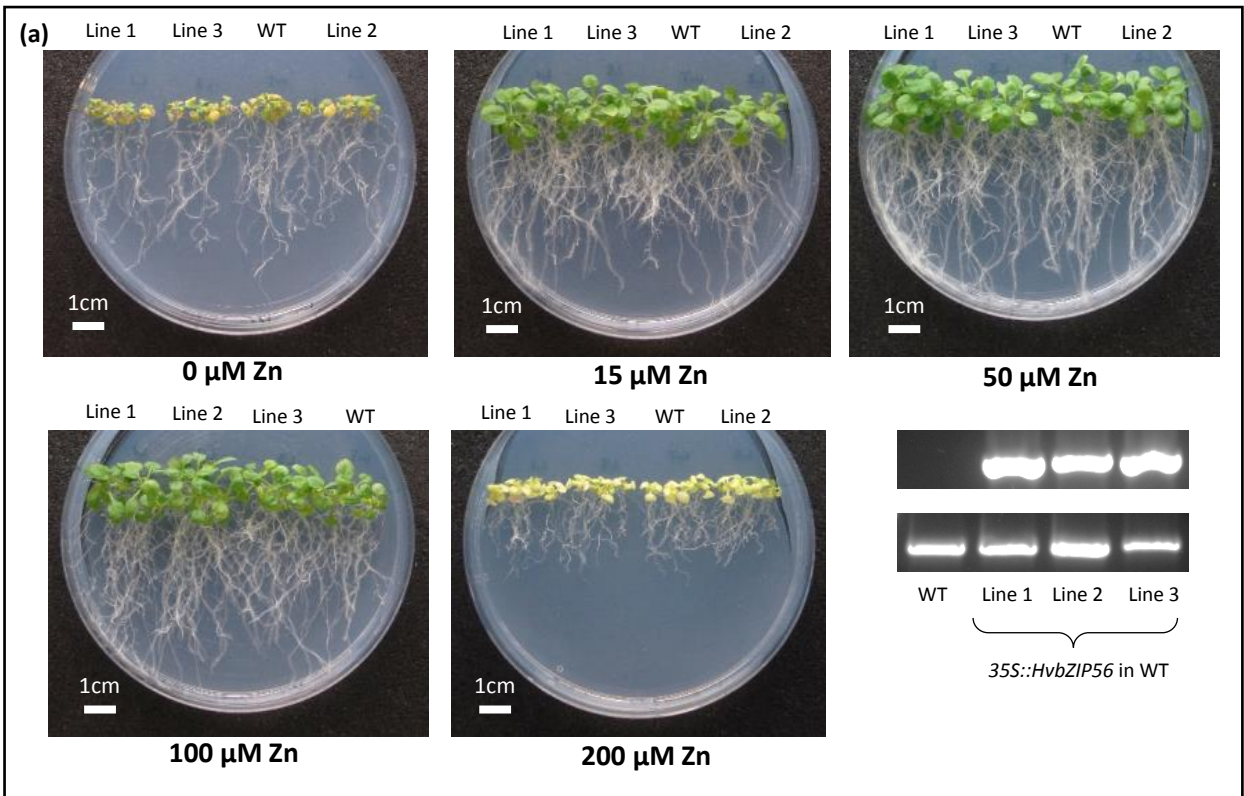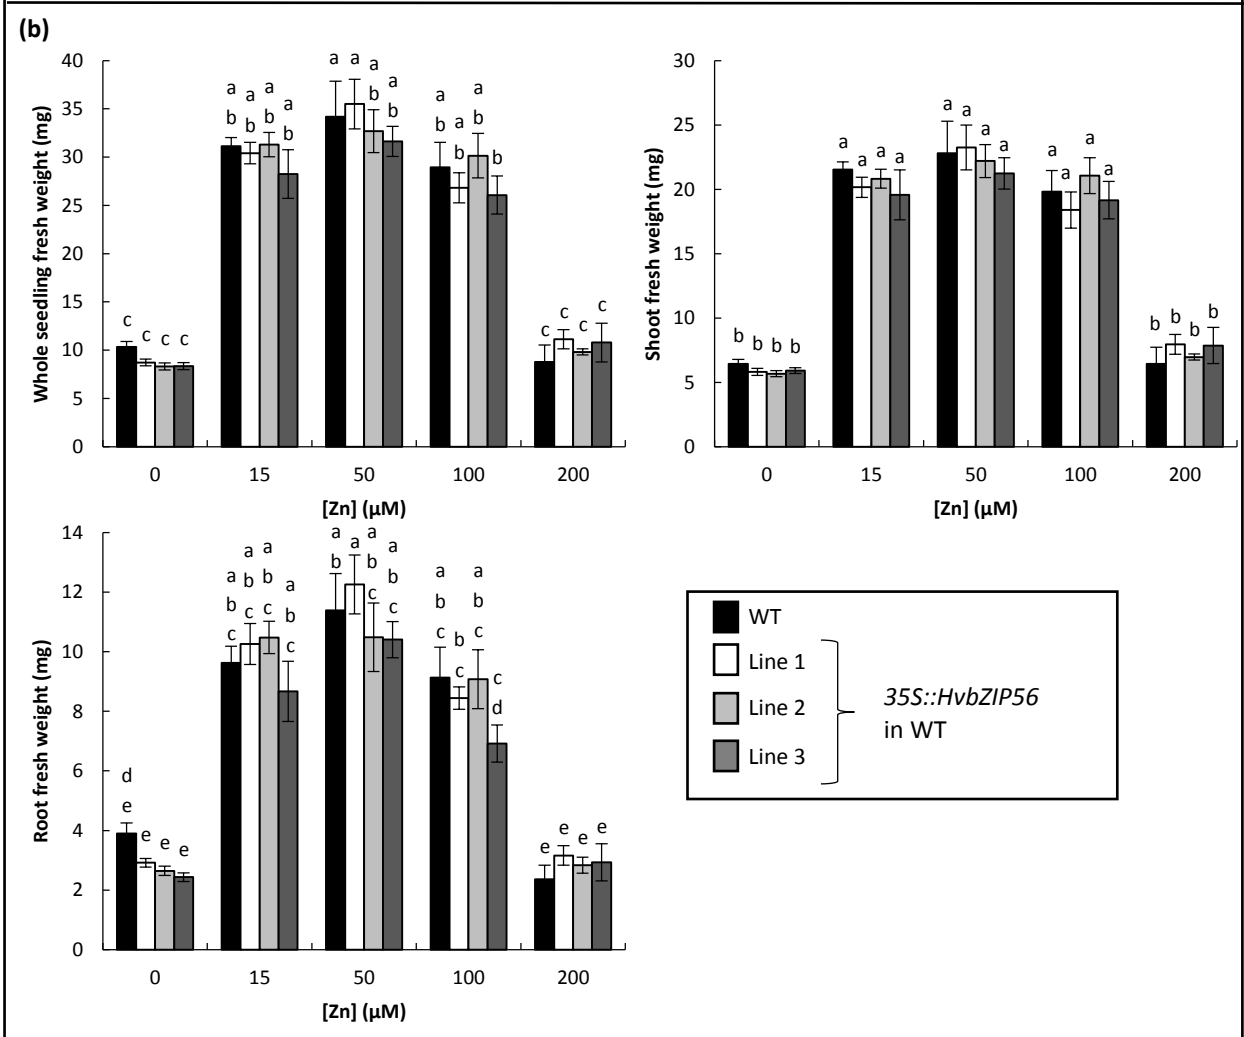

**Fig. S9 HvbZIP56 expression in wild type Arabidopsis does not influence their response to Zn deficiency or Zn excess.** a) Images of representative plates and expression of HvbZIP56 in wild type (WT) with upper panel showing products for *HvbZIP56* and lower panel shows products for actin. (b) Wild type (WT) and *35S::HvbZIP56*-expressing lines grown on half MS media under a range of Zn concentrations. Total fresh weight is shown; the means (+/- SEM) were based on six plates with four seedlings per line, per plate, each plate containing three plant lines. Means not sharing a letter are significantly different ( $P \leq 0.05$ ); Tukey post-hoc test.

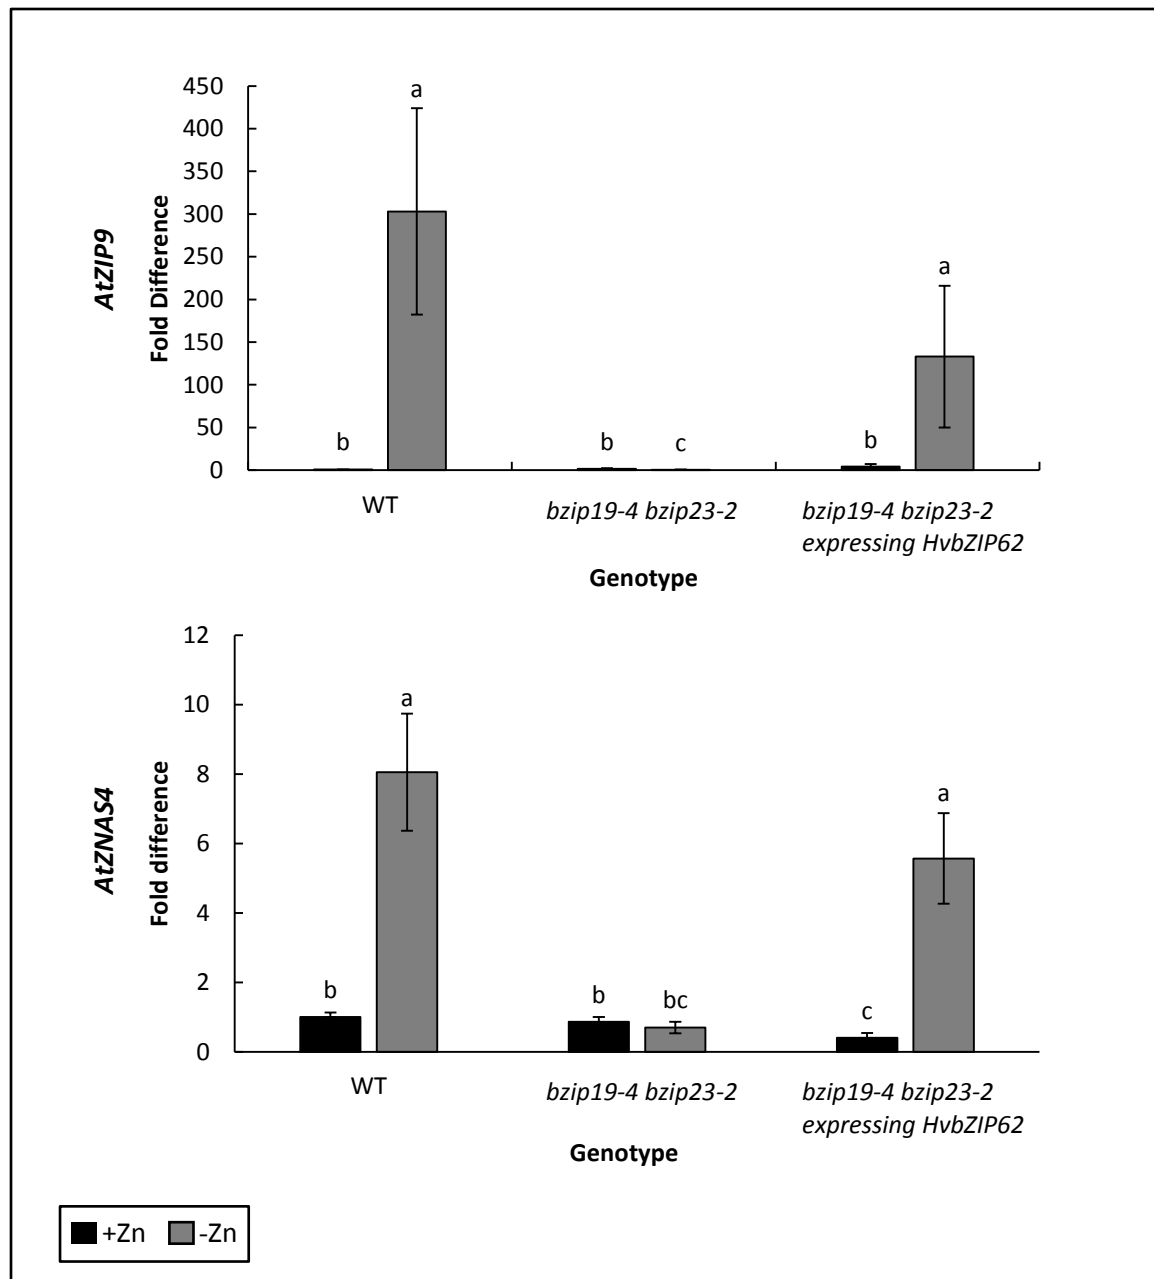

**Figure S10. HvbZIP62 restores gene expression in response to Zn-deficiency in the Arabidopsis *bzip19-4 bzip23-2* mutant.** Real-time PCR to compare Arabidopsis gene expression in response to Zn deficiency in wild type (WT), *bzip19-4 bzip23-2* double mutant, and *HvbZIP62*-expressing *bzip19 bzip23* line 1. Seedlings were grown for 3 weeks on MS medium with Zn (black) or without Zn (grey). *SAND* was used for normalization. The expression levels were relative to that in wild-type (WT) seedlings grown with Zn, which was expressed as 1. Data presented are means (+/- SEM) of three biological replicates. Means not sharing a letter are significantly different ( $P \leq 0.05$ ); Fisher's Least Significant Difference (LSD) post-hoc test.

**(a)**

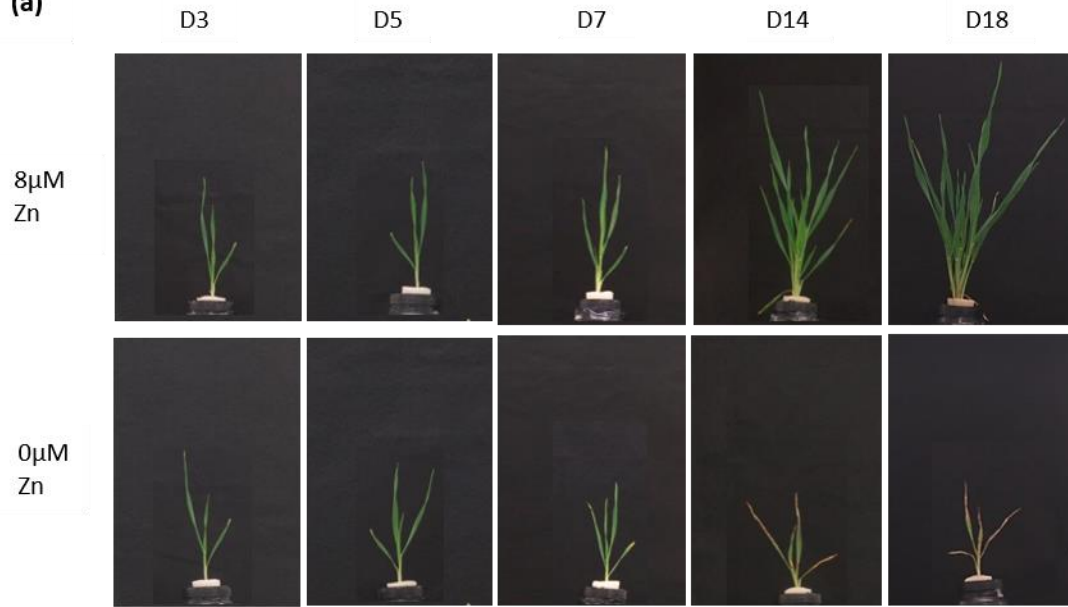

Scale bar = 15cm 

**(b)**

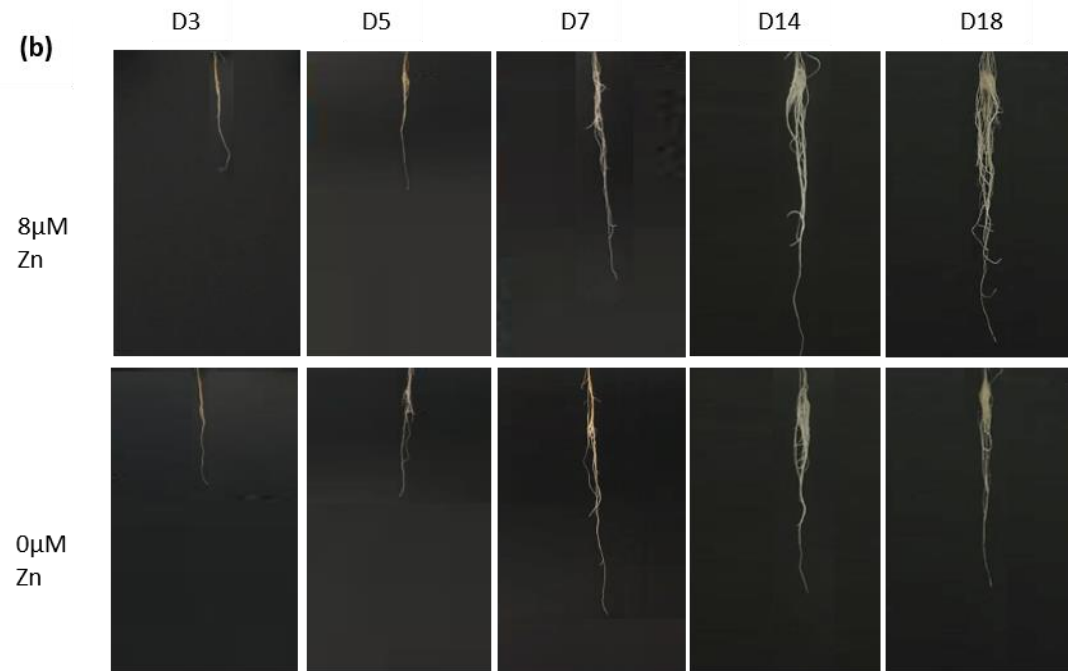

Scale bar = 15cm 

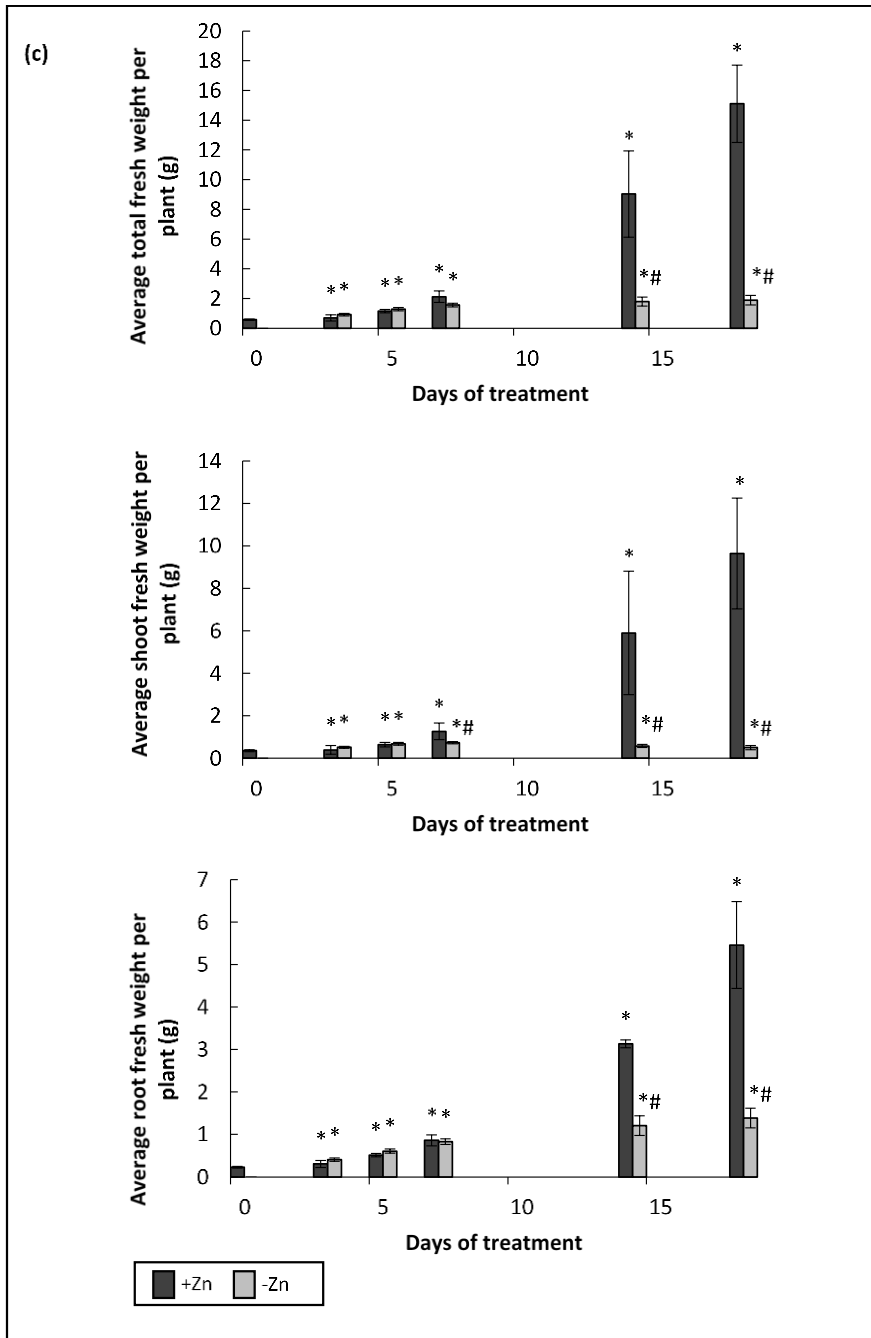

**Fig. S11 Barley displays deficiency symptoms when grown under Zn-deficient conditions.** Barley was grown on normal Zn ( $8 \mu\text{M}$  Zn) for 7 days before they were treated with either  $8 \mu\text{M}$  Zn (+Zn) or  $0 \mu\text{M}$  Zn (-Zn) for 0, 7 and 14 days. Photographs of shoots (a) and roots (b) and mean fresh weight measurements per plant ( $\pm$  SEM) for total fresh weight, shoot weight and root weight (c). #,  $P \leq 0.05$  = significantly different to the mean of Zn-treated plants ( $\pm$  SEM). \*,  $P \leq 0.05$  = significantly different to the mean of Day 0 plants ( $\pm$  SEM); Tukey post-hoc test.

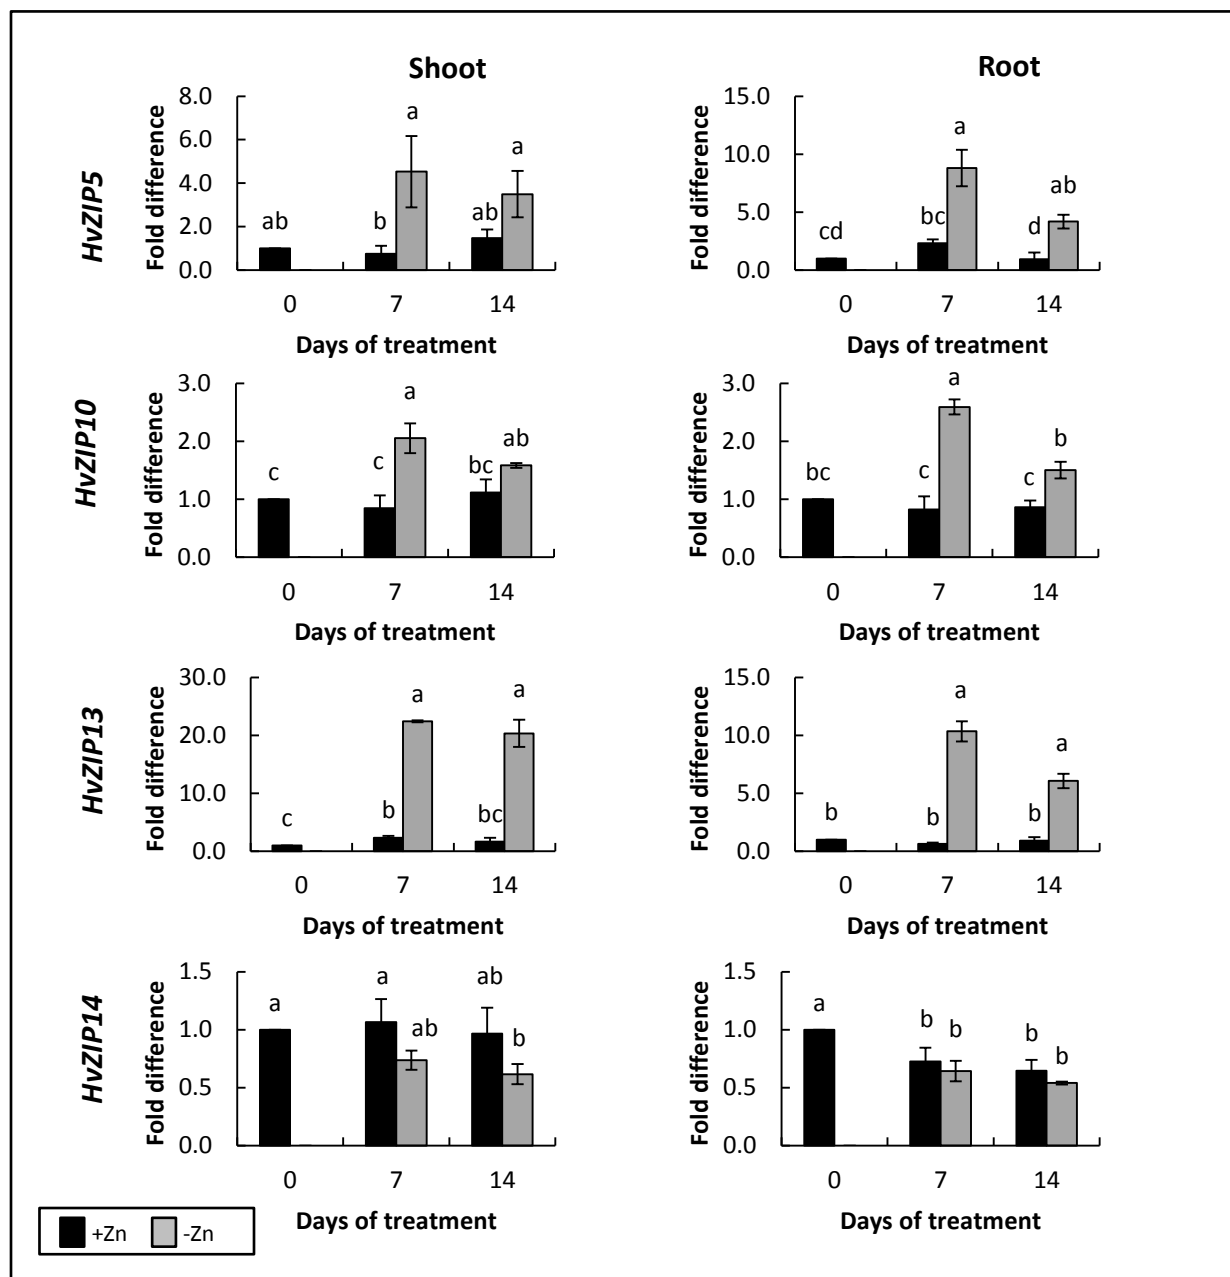

**Fig. S12 Regulation of ZIPs following imposition of Zn-deficiency conditions.** Real-time PCR determining gene expression of barley ZIPS in roots and shoots over time in response to Zn deficiency. The gene relative expression levels were calculated based Pfaffl (2001), standardised by normalizing to *HvRNABP* (Mikkelsen et al. 2012) and analyzed using Opticon software. Expression levels were relative to expression at day 0 of the treatment which was expressed as 1. All data are means (+/- SEM) of three biological replicates. Black bar and grey bar indicate gene expression level under 8  $\mu$ M Zn (+Zn) and 0  $\mu$ M Zn (-Zn) conditions respectively. Means not sharing a letter are significantly different ( $P \leq 0.05$ ); Fisher's Least Significant Difference (LSD) post-hoc test.

(i)

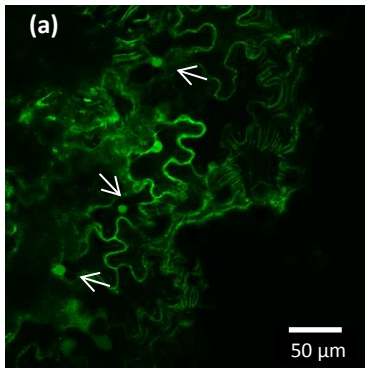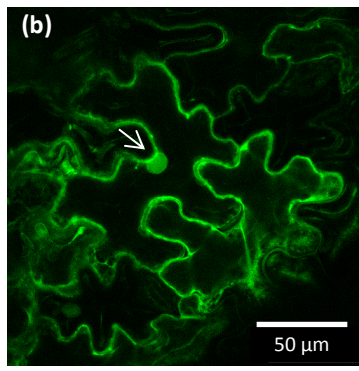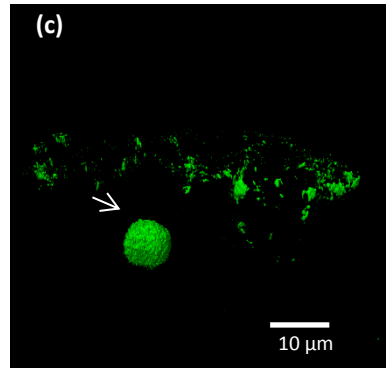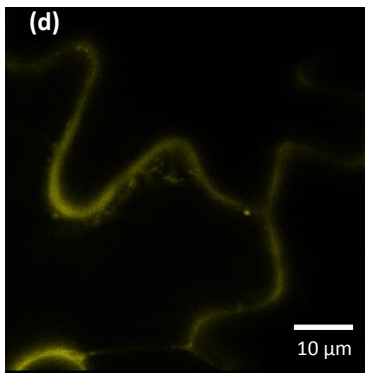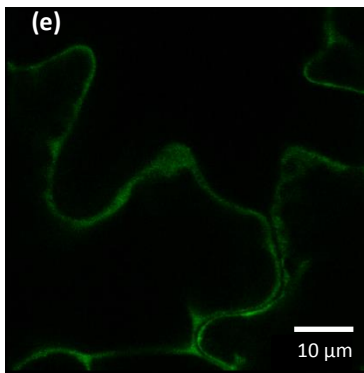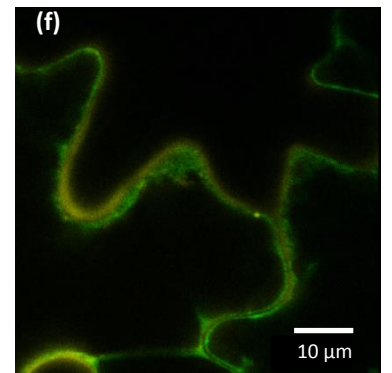

(ii)

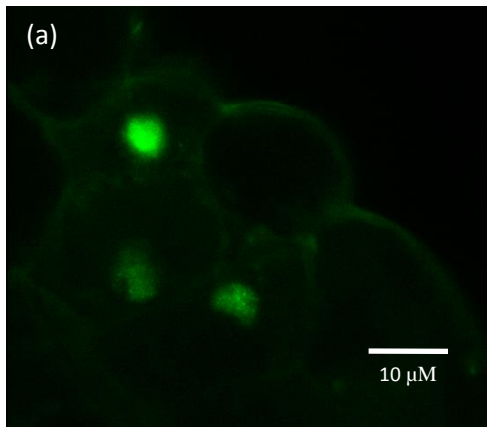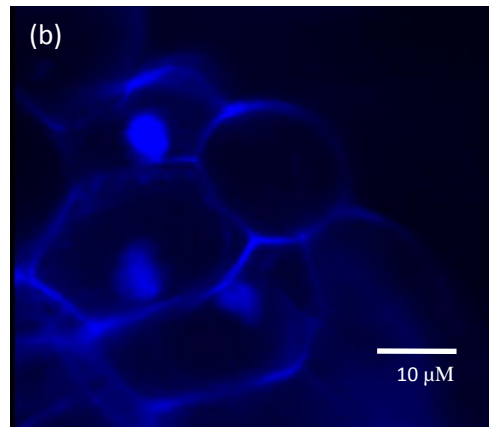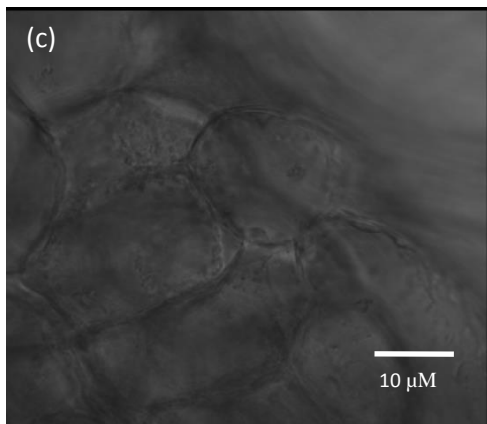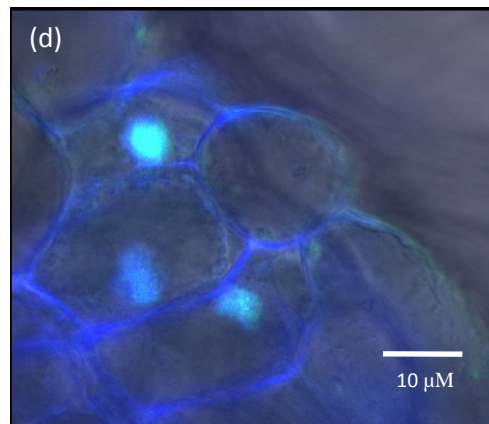

**Fig. S13 Localisation of HvbZIP56-GFP in tobacco (i).** Confocal images: Top panel: Transient expression of *35S::HvbZIP56-GFP* in tobacco showing localisation in the cytoplasm and nucleus at increasing levels of magnification (a,b,c). Lower panel: localisation of *35S::HvbZIP56-GFP* (green) in cytoplasm (d) and *35S::LTI6b-mOrange2* (orange) at the plasma membrane (e), the overlay showing *LTI6b-mOrange2* is external to *HvbZIP56-GFP* (f). (ii) Colocalisation of *HvbZIP56-GFP* (a; shown in green) with a nucleus of root cell stained with Hoechst 33342 (b; shown in blue). The images were taken from the 10-day old *Arabidopsis bzip19-4 bzip23-2* mutant. The DIC image (c) and the overlay (d) of the same root cell were also taken.

**Table S1 Primer purpose, nomenclature and sequence**

| <b>Purpose: Genotyping <i>bzip19</i> and <i>bzip23</i> Arabidopsis mutants.</b>       |                    |                            |
|---------------------------------------------------------------------------------------|--------------------|----------------------------|
| <b>No</b>                                                                             | <b>Primer name</b> | <b>Sequence (5' to 3')</b> |
| 1                                                                                     | LBa1               | TGGTTCACGTAGTGGGCCATCG     |
| 2                                                                                     | LBb1               | GCGTGGACCGCTTGCTGCAACT     |
| 3                                                                                     | bZIP19F2           | CTGTTTAGTGCGCCTTTAT        |
| 4                                                                                     | bZIP23R2           | AAGGAACCTGAGCGAAGCTG       |
| 5                                                                                     | bZIP23F2           | TCTTAAACCCTTCTCGCCGT       |
| 6                                                                                     | bZIP23R2           | CAAACCTGCTTTCGCTGCTCG      |
| 7                                                                                     | Actin2.F           | GGTAACATTGTGCTCAGTGGTGG    |
| 8                                                                                     | Actin2.R           | CTCGGCCTTGGAGATCCACATC     |
| <b>Purpose: Barley <i>bZIP</i> genes GATEWAY cloning</b>                              |                    |                            |
| <b>No</b>                                                                             | <b>Primer name</b> | <b>Sequence (5' to 3')</b> |
| 9                                                                                     | HvbZIP1Topo_F      | CACCATGGACGACGGGCACCTC     |
| 10                                                                                    | HvbZIP1Topo_S      | CTAATGAAAACACGTATGAGG      |
| 11                                                                                    | HvbZIP10Topo_F     | CACCATGGACGACAACGGGGAC     |
| 12                                                                                    | HvbZIP10Topo_S     | TCACCTCTTTACATCATCTGGCA    |
| 13                                                                                    | HvbZIP55Topo_F     | CACCATGGACGACGGACTATAC     |
| 14                                                                                    | HvbZIP55Topo_S     | TTAGGCAACAGAGTTCACGAAGC    |
| 15                                                                                    | HvbZIP56Topo_F     | CACCATGGACGACGGGGACATC     |
| 16                                                                                    | HvbZIP56Topo_S     | TCATTATAGCATCCTAGCTAACG    |
| 17                                                                                    | HvbZIP56Topo_NS    | CAGCATTTGGCCCCACGG         |
| 18                                                                                    | HvbZIP57Topo_F     | CACCATGGACGACGGGGTGGAC     |
| 19                                                                                    | HvbZIP57Topo_S     | TCAGCTAGGGAAGCAGAGCTC      |
| 20                                                                                    | HvbZIP58Topo_F     | CACCATGGACGACGGGGACCTG     |
| 21                                                                                    | HvbZIP58Topo_S     | CTAACGAAAACAGACAGGAGG      |
| 22                                                                                    | HvbZIP62Topo_F     | CACCATGGATGACGGGGACCTC     |
| 23                                                                                    | HvbZIP62Topo_S     | TCACTGCTTTTCGGAAGTGGG      |
| <b>Function: Real time PCR, barley <i>bZIP</i> and <i>ZIP</i> expression analysis</b> |                    |                            |
| <b>No</b>                                                                             | <b>Primer name</b> | <b>Sequence (5' to 3')</b> |
| 24                                                                                    | HvRNABP F          | CGCCCAGTTATCCATCCATCTA     |
| 25                                                                                    | HvRNABP R          | AAAAACACCACAGGACCGGAC      |
| 26                                                                                    | HvGADPH F          | GCTCAAGGGTATCATGGGTACG     |



|                                                                     |              |                           |
|---------------------------------------------------------------------|--------------|---------------------------|
| 27                                                                  | HvGADPH R    | GCAATTCAGCCTTAGCATCAAAG   |
| 28                                                                  | HvZIP5rtF    | ATCATCGGCATGTCTTGGG       |
| 29                                                                  | HvZIP5rtR    | AAGAAAGACTTGTGGCGAAACC    |
| 30                                                                  | HvZIP13rtF   | GCTCGGCATCAACATCTCC       |
| 31                                                                  | HvZIP13rtR   | GTTGTAGGCTTGCGGCTAG       |
| 32                                                                  | HvZIP14rtF   | CACAGATGCACGATCAGAGAAC    |
| 33                                                                  | HvZIP14rtR   | CCACAATATCCACGGAATCATA    |
| 34                                                                  | HvbZIP1rtF   | ACGACATCCTCATGGACACG      |
| 35                                                                  | HvbZIP1rtR   | TAATCTGGGCACCGCCCT        |
| 36                                                                  | HvZIP10rtF   | GACCTCATTGCTGCTGATTT      |
| 37                                                                  | HvZIP10rtR   | AGCTAGGCAACAGGTGCTAGT     |
| 38                                                                  | HvbZIP55rtF  | TCTGTCGTCTGTACTGCTGC      |
| 39                                                                  | HvbZIP55rtR  | ACAGCATCCACCACTTCAGG      |
| 40                                                                  | HvbZIP56rtF  | TGCCGGTGACACTATGGGTT      |
| 41                                                                  | HvbZIP56rtR  | TTACAGCATTTGGCCCCA        |
| 42                                                                  | HvbZIP57rtF  | ATTGCGGGCTCGATGAAGAT      |
| 43                                                                  | HvbZIP57rtR  | GCTAGGGAAGCAGAGCTCAA      |
| 44                                                                  | HvbZIP58rtF  | GTCAGGGGCAGGATCGAAG       |
| 45                                                                  | HvbZIP58rtR  | TGAGCTCATCATGACCGGG       |
| 46                                                                  | HvbZIP62rtF  | CATTGGGGGTGCGAAATCTG      |
| 47                                                                  | HvbZIP62rtR  | GAACTGGGTAAACAGCCGGA      |
| <b>Function: Real time PCR, Arabidopsis ZIP expression analysis</b> |              |                           |
| 48                                                                  | AtSANDrtF    | AACTCTATGCAGCATTTGATCCACT |
| 49                                                                  | AtSANDrtR    | TGATTGCATATCTTTATCGCCATC  |
| 50                                                                  | AtZIP2rtF    | TAATAACAACCACGTCCGAG      |
| 51                                                                  | AtZIP2rtR    | AGCAAAGCTGTGTCTCCAAA      |
| 52                                                                  | AtZIP4rtF    | CACGGACATATGCACGGGAA      |
| 53                                                                  | AtZIP4rtR    | GACACAATCCCGAGCTCCAA      |
| 54                                                                  | AtNAS4rtF    | TCGGATCTCGCGTGTAACCTG     |
| 55                                                                  | AtNAS4rtR    | CACCTGCGAACTCCTCGATA      |
| 56                                                                  | AtDEFL203rtF | TAATGGACTCCCAAAGGCGG      |
| 57                                                                  | AtDEFL203rtR | ACTTCACATGCCCCAAACCA      |
| 58                                                                  | AtZIP9rtF    | CAATAATCATAGGAATATCGCTTGG |
| 59                                                                  | AtZIP9rtR    | AGAAAGCCATCATGGCAGAT      |
| 60                                                                  | AtZIP12rtF   | CAATGTTGATTGAATCCTTTGC    |
| 61                                                                  | AtZIP12rtR   | CCATGAGAATGTCCTTGTGA      |

**Table S2 HvbZIPs identified from bioinformatics analysis**

|          | Contigs                                                                                                                                                                                                  | Position                                | NCBI cDNA accession No. (cultivar) | MIPs <sup>1</sup> cDNA accession No. (cultivar) | Amplification/Cloning | Molecular weight (Da) of GP sequence |
|----------|----------------------------------------------------------------------------------------------------------------------------------------------------------------------------------------------------------|-----------------------------------------|------------------------------------|-------------------------------------------------|-----------------------|--------------------------------------|
| HvbZIP1  | - morex_contig_11993 (Full-length)<br>- bowman_contig_63503 (Full-length and identical to the Morex background)<br>- barke_contig_276336 (partial sequence)                                              | Chromosome 7HL :33,218,969 - 33,219,416 | Not found                          | MLOC_2245.1 (Morex)                             | Yes/Yes               | 19,857                               |
| HvbZIP10 | - morex_contig_1563657 (Full-length)<br>- bowman_contig_846659 (Full-length and identical to the Morex background)<br>- barke_contig_268371 ((Full-length but 3 bp longer than found in Morex or Bowman) | Chromosome 7H: 536,391,693-536,392,374  | Not found                          | MLOC_12585.1 (Morex)                            | Yes/Yes               | 24,329                               |
| HvbZIP55 | - morex_contig_136513 (Full-length)<br>- bowman_contig_63503 (Full-length and identical to the Morex background)<br>- barke_contig_282304 and 486135 (partial sequences)                                 | Chromosome 3H: 461,941,056-461,941,698  | AK354846.1 (Haruna Nijo)           | MLOC_5655 (Morex)                               | Yes/Yes               | 23,011                               |
| HvbZIP56 | - morex_contig_38563 (Full-length)<br>- bowman_contig_1981097 (Full-length and identical to the Morex background)<br>- barke_contig_1785171 (partial sequence)                                           | Chromosome 7H: 591,350,097-591,350,849  | AK253086.1 (Haruna Nijo)           | MLOC_53694.1 (Morex)                            | Yes/Yes               | 27,243                               |
| HvbZIP57 | - morex_contig_1565570 (Full-length)<br>- bowman_contig_1995766 (Full-length and identical to the Morex background)                                                                                      | Chromosome 1H: 35,678,456-35,679,076    | AK371968.1 (Haruna Nijo)           | MLOC_13410 (Morex)                              | Yes/Yes               | 23,972                               |
| HvbZIP58 | - morex_contig_236589 and 1591639 (partial sequences)<br>- bowman_contig_1978011 and 123086 (partial sequences)                                                                                          | Chromosome 7HL: 38,634,376-38,634,982   | AK354735.1 (Haruna Nijo)           | Not found                                       | Yes/Yes               | 21,819                               |
| HvbZIP61 | Not found                                                                                                                                                                                                | Not found                               | AK361769.1 (Haruna Nijo)           | Not found                                       | No/No                 | 35,779*                              |
| HvbZIP62 | - morex_contig_44880 (Full length)<br>- bowman_contig_849113 (Full-length but 9 bp longer than found in Morex)                                                                                           | Chromosome 5H: 9,201,389-9,202,168      | Not found                          | MLOC_60894.1 (Morex)                            | Yes/Yes               | 27,539                               |

\* molecular weight predicted from the Haruna Nijo sequence.

**Table S3. Accession numbers for sequences used in the phylogenetic analysis in Figure 1.**

| <b>Species</b> | <b>Nomenclature</b> | <b>Accession No.</b>  |
|----------------|---------------------|-----------------------|
| Wheat          | TabZIP4             | Traes_1AL_00A8A2030.2 |
|                | TabZIP33            | Traes_5AS_6F02C9967.1 |
|                | TabZIP55            | Traes_7AL_A8CAE984E.1 |
|                | TabZIP56            | Traes_7AL_C7CF7087B.2 |
|                | TabZIP62            | Traes_1BL_1A885E733.1 |
|                | TabZIP79            | Traes_3B_34C2CD876.2  |
|                | TabZIP97            | Traes_5BS_FC54F9BEA.1 |
|                | TabZIP120           | Traes_7BL_096916DC5.1 |
|                | TabZIP150           | Traes_5DS_4F7973584.1 |
|                | TabZIP179           | Traes_7DL_70D4FDB2A.1 |
|                | TabZIP180           | Traes_7DL_7DDA16622.3 |
| Rice           | OsbZIP7             | LOC_Os01g58760        |
|                | OsbZIP44            | LOC_Os05g41540        |
|                | OsbZIP48/53         | LOC_Os06g50310        |
| Arabidopsis    | AtbZIP19            | At4G35040             |
|                | AtbZIP23            | At2G16770.1           |
|                | AtbZIP24            | At3G51960             |
| Brachypodium   | BdbZIP11            | Bradi1g30140.1        |
|                | BdbZIP32            | Bradi2g21197          |
|                | BdbZIP33            | Bradi2g21200          |
|                | BdbZIP44            | Bradi2g52590          |
| Cucumber       | CsbZIP59            | XP_004147043          |
|                | CsbZIP60            | XP_004144846          |
| Barley         | HvbZIP1             | MLOC_2245.1           |
|                | HvbZIP10            | MLOC_12585.1          |
|                | HvbZIP55            | MLOC_5655             |
|                | HvbZIP56            | MLOC_53694.1          |
|                | HvbZIP57            | MLOC_13410            |
|                | HvbZIP58            | BAJ85954.1            |
|                | HvbZIP61            | BAJ92973.1            |
|                | HvbZIP62            | MLOC_60894.1          |

Wheat F group sequences (Li et al. 2015); Rice and Brachypodium (Liu and Chu 2015); Arabidopsis (Assuncao et al. 2010); Cucumber (Baloglu et al. 2015). The barley sequences used in the phylogenetic tree are mainly those cloned from Golden Promise in this study; the accession numbers given above are for sequences from Morex and Haruna Nijo.

**Table S4 Percentage identity/similarity of Arabidopsis, and barley F group bZIP**

| Sequence                     | AtbZIP19 | AtbZIP23 | AtbZIP24 | HvbZIP1 | HvbZIP10 | HvbZIP55 | HvbZIP56 | HvbZIP57 | HvbZIP58 | HvbZIP61/<br>BA92973 | HvbZIP62 |
|------------------------------|----------|----------|----------|---------|----------|----------|----------|----------|----------|----------------------|----------|
| <b>AtbZIP19</b>              |          | 69.5     | 28.4     | 33.0    | 34.9     | 33.6     | 43.3     | 38.6     | 34.4     | 8.3                  | 41.4     |
| <b>AtbZIP23</b>              | 80.3     |          | 32.6     | 33.0    | 38.3     | 35.6     | 41.5     | 39.9     | 36.6     | 9.4                  | 44.7     |
| <b>AtbZIP24</b>              | 45.2     | 44.1     |          | 28.2    | 25.1     | 27.5     | 30.7     | 28.2     | 33.8     | 10.8                 | 29.4     |
| <b>HvbZIP1</b>               | 44.3     | 43.3     | 43.1     |         | 42.9     | 33.1     | 45.8     | 33.7     | 72.9     | 9.7                  | 42.4     |
| <b>HvbZIP10</b>              | 48.1     | 52.9     | 36.9     | 49.3    |          | 31.4     | 56.4     | 28.7     | 36.3     | 9.3                  | 50.5     |
| <b>HvbZIP55</b>              | 46.6     | 47.0     | 41.6     | 41.8    | 41.7     |          | 36.5     | 50.2     | 36.2     | 10.1                 | 30.6     |
| <b>HvbZIP56</b>              | 58.5     | 52.9     | 45.1     | 52.7    | 65.6     | 53.6     |          | 39.9     | 45.1     | 7.5                  | 65.1     |
| <b>HvbZIP57</b>              | 47.4     | 49.6     | 41.8     | 43.4    | 39.8     | 58.0     | 48.2     |          | 36.1     | 8.8                  | 39.3     |
| <b>HvbZIP58</b>              | 44.0     | 49.1     | 47.1     | 79.3    | 43.6     | 46.9     | 51.9     | 41.7     |          | 9.5                  | 42.5     |
| <b>HvbZIP61/<br/>BA92973</b> | 16.2     | 15.4     | 18.5     | 15.1    | 13.8     | 15.4     | 13.8     | 15.9     | 13.3     |                      | 9.7      |
| <b>HvbZIP62</b>              | 55.9     | 59.5     | 43.2     | 48.8    | 57.8     | 39.7     | 71.7     | 49.6     | 49.3     | 13.3                 |          |

Top diagonal none-shaded = percent identity. Bottom diagonal = percent similarity. [HvbZIP61/BA92973](#) is included for comparison but may not be a barley gene (see text).

**Table S5 Nomenclature of mutant lines**

| <b>Line Number</b>   | <b>SALK Number</b> | <b>Segregation Status supplied</b> | <b>Gene</b>   | <b>Assuncao et al. (2010) mutant name</b> | <b>Inaba et al. (2015) mutant name</b>                  | <b>Proposed mutant name by this study</b> |
|----------------------|--------------------|------------------------------------|---------------|-------------------------------------------|---------------------------------------------------------|-------------------------------------------|
| N667534 <sup>1</sup> | SALK_144252C       | Homozygous                         | <i>bZIP19</i> | <i>bzip19-1</i>                           | N/A                                                     | <i>bzip19-1</i>                           |
| N657869              | SALK_005336C       | Homozygous                         | <i>bZIP19</i> | N/A                                       | <i>bzip19-1</i>                                         | <i>bzip19-4</i>                           |
| N506692              | SALK_006692        | Segregating                        | <i>bZIP19</i> | N/A                                       | <i>bzip19-2</i>                                         | <i>bzip19-2</i>                           |
| N583399              | SALK_083399        | Segregating                        | <i>bZIP19</i> | N/A                                       | <i>bzip19-3</i>                                         | N/A                                       |
| N656437              | SALK_045200C       | Homozygous                         | <i>bZIP23</i> | <i>bzip23-1</i>                           | <i>bzip23-1, bzip23-2 (in different parts of paper)</i> | <i>bzip23-1</i>                           |
| N653060              | SALK_018248C       | Homozygous                         | <i>bZIP23</i> | N/A                                       | <i>bzip23-1, bzip23-2 (in different parts of paper)</i> | <i>bzip23-2</i>                           |

<sup>1</sup> Homozygous line replacing the N644252 retired line

**Table 6 ZDRE motifs and position**

| <b>Barley ZIP/bZIP</b> | <b>No. of potential ZDRE motifs</b> | <b>Closest sequence to the ZDRE (5' to 3')</b><br><b>RTGTCGACAY (cultivar)</b> | <b>Position (upstream from the start codon) ZDRE (closest sequence)</b> |
|------------------------|-------------------------------------|--------------------------------------------------------------------------------|-------------------------------------------------------------------------|
| <i>HvIRT1</i>          | 1                                   | CTGTCGCCAC (morex/bowman)                                                      | 1186 bp                                                                 |
| <i>HvZIP1</i>          | 1                                   | ATGTCTCGAG (morex/bowman)                                                      | 295 bp                                                                  |
| <i>HvZIP2</i>          | 1                                   | CTGACGACAC (morex/bowman)                                                      | 730 bp                                                                  |
| <i>HvZIP3</i>          | 2                                   | GTGTCAACAC (morex/bowman)<br>GTGT <b>TCGACAA</b> * (morex/bowman)              | 546 bp<br>1604 bp                                                       |
| <i>HvZIP5</i>          | 2                                   | GTGT <b>TCGACAC</b> * (morex/bowman)<br>GTGT <b>TCGACAC</b> * (morex/bowman)   | 689 bp<br>928 bp                                                        |
| <i>HvZIP6</i>          | 2                                   | GTT <b>TCGACAC</b> (morex/bowman)<br>ATGT <b>GC</b> AAG (morex/bowman)         | 186 bp<br>311 bp                                                        |
| <i>HvZIP7</i>          | 1                                   | ATGT <b>TCGACAT</b> * (morex/bowman)                                           | 672 bp                                                                  |
| <i>HvZIP8</i>          | 1                                   | GTGT <b>TCGACAC</b> * (morex/bowman)                                           | 658 bp                                                                  |
| <i>HvZIP10</i>         | 1                                   | GTGT <b>TCGACAC</b> * (morex/bowman)                                           | 443 bp                                                                  |
| <i>HvZIP11</i>         | 1                                   | ATGTCGGCTT (morex/bowman)                                                      | 165 bp                                                                  |
| <i>HvZIP13</i>         | 1                                   | ATGTCGTCAC (morex/bowman)                                                      | 243 bp                                                                  |
| <i>HvZIP14</i>         | 2                                   | AAGTCAACAA (morex/bowman)<br>ATGTCTTGAC (morex/bowman)                         | 187 bp<br>1055 bp                                                       |
| <i>HvZIP16</i>         | 1                                   | ATGCCACAC (morex/bowman)                                                       | 496 bp                                                                  |
| <i>HvbZIP1</i>         | 1                                   | ATGT <b>TCGACAT</b> * (morex/bowman)                                           | 113 bp                                                                  |
| <i>HvbZIP10</i>        | 1                                   | ATGACGACAT (morex/bowman)                                                      | 397 bp                                                                  |
| <i>HvbZIP55</i>        | 1                                   | TGTCTAGACA (morex/bowman)                                                      | 1022 bp                                                                 |
| <i>HvbZIP56</i>        | 1                                   | ATGTCATCGA (morex/bowman)                                                      | 988 bp                                                                  |
| <i>HvbZIP57</i>        | 1                                   | TGTCGTCCGA (morex/bowman)                                                      | 131 bp                                                                  |
| <i>HvbZIP58</i>        | 1                                   | ATGT <b>TCGACAC</b> * (morex/bowman)                                           | 106 bp                                                                  |
| <i>HvbZIP61</i>        | N/A                                 | N/A                                                                            | No promoter sequence was found                                          |
| <i>HvbZIP62</i>        | 1                                   | ATGCCACAT (morex/bowman)                                                       | 749 bp                                                                  |

\* = ZDRE motif palindromic
